# Supplementary material for: Four New Sesquiterpenoids from the Rice Fermentation of Antrodiella albocinnamomea
Source: MDPI journal article supplement (doi:10.3390/molecules27103344), 2022-05-23
Supplement: s1 [file s1]

# Four New Sesquiterpenoids from the Rice Fermentation of *Antrodiella albocinnamomea*

Min Guo <sup>1</sup>, Ying-Zhong Liang <sup>1</sup>, Xiu-Ming Cui <sup>1, 2</sup>, Lin-Jiao Shao <sup>1</sup>, Yin-Fei Li <sup>1</sup>, and  
Xiao-Yan Yang <sup>1, 2, \*</sup>

<sup>1</sup> Faculty of Life Science and Technology, Kunming University of Science and Technology, Kunming  
650500, China, guomin@stu.kust.edu.cn (M. G.); lyz@stu.kust.edu.cn (Y.-Z. L.); 20120094@kust.edu.cn  
(X.-M. C.); shaolinjiao@stu.kust.edu.cn (L.-J. S.); liyinfei@stu.kust.edu.cn (Y.- F. L.); yangxy@kust.edu.cn  
(X.-Y. Y.)

<sup>2</sup> Yunnan Key Laboratory of Sustainable Utilization of *Panax Notoginseng*, Kunming 650500, China

\*Correspondence: yangxy@kust.edu.cn (X.-Y. Y.); Tel.: +86-159-6946-8214 (X.-Y. Y.)

## Table of Contents

**Table S1.** Experimental and calculated  $^{13}\text{C}$  data for possible structures of compounds **1**, **2** and **4** ( $\delta$  in ppm)

**Table S2.** Regression analysis of  $^{13}\text{C}$  NMR chemical displacement calculation and experimental value of eight possible configurations of compounds **1**, **2** and **4**

**Table S3.** DP4+ Analysis

**Figure S1.** Experimental and calculated ECD spectra of compound **1**

**Figure S2.** HR-ESI-MS spectrum of compound **1**

**Figure S3.** IR spectrum of compound **1**

**Figure S4.**  $^1\text{H}$  NMR spectrum (600MHz,  $\text{CDCl}_3$ ) of **1**

**Figure S5.**  $^{13}\text{C}$  and DEPT spectrum (150MHz,  $\text{CDCl}_3$ ) of **1**

**Figure S6.** HSQC spectrum of **1**

**Figure S7.** HMBC spectrum of **1**

**Figure S8.**  $^1\text{H}$ - $^1\text{H}$  COSY spectrum of **1**

**Figure S9.** ROESY spectrum of **1**

**Figure S10.** HR-ESI-MS spectrum of compound **2**

**Figure S11.** IR spectrum of compound **2**

**Figure S12.**  $^1\text{H}$  NMR spectrum (600MHz,  $\text{CDCl}_3$ ) of **2**

**Figure S13.**  $^{13}\text{C}$  and DEPT spectrum (150MHz,  $\text{CDCl}_3$ ) of **2**

**Figure S14.** HSQC spectrum of **2**

**Figure S15.** HMBC spectrum of **2**

**Figure S16.**  $^1\text{H}$ - $^1\text{H}$  COSY spectrum of **2**

**Figure S17.** ROESY spectrum of **2**

**Figure S18.** HR-ESI-MS spectrum of compound **3**

**Figure S19.** IR spectrum of compound **3**

**Figure S20.**  $^1\text{H}$  NMR spectrum (600MHz,  $\text{CDCl}_3$ ) of **3**

**Figure S21.**  $^{13}\text{C}$  and DEPT spectrum (150MHz,  $\text{CDCl}_3$ ) of **3**

**Figure S22.** HSQC spectrum of **3**

**Figure S23.** HMBC spectrum of **3**

**Figure S24.**  $^1\text{H}$ - $^1\text{H}$  COSY spectrum of **3**

**Figure S25.** ROESY spectrum of **3**

**Figure S26.** Experimental and calculated ECD spectra of compound **4**

**Figure S27.** HR-ESI-MS spectrum of compound **4**

**Figure S28.** IR spectrum of compound **4**

**Figure S29.**  $^1\text{H}$  NMR spectrum (600MHz,  $\text{CD}_3\text{OD}$ ) of **4**

**Figure S30.**  $^{13}\text{C}$  and DEPT spectrum (150MHz,  $\text{CD}_3\text{OD}$ ) of **4**

**Figure S31.** HSQC spectrum of **4**

**Figure S32.** HMBC spectrum of **4**

**Figure S33.**  $^1\text{H}$ - $^1\text{H}$  COSY spectrum of **4**

**Figure S34.** ROESY spectrum of **4**

**Figure S35.** There are possible configurations of compounds **1**, **2** and **4**

**Figure S36.** Linear correlation plots of calculate-experimental  $^{13}\text{C}$  NMR chemical shift values for (6*R*,7*S*)-**1a**; (6*R*,7*R*)-**1b**; (6*S*,7*R*)-**1c**; (6*S*,7*S*)-**1d**; (5*S*,6*S*)-**2a**; (5*S*,6*R*)-**2b**; (5*R*,6*S*)-**2c**; (5*R*,6*R*)-**2d**, (5*R*,9*S*,13*S*)-**4a**; (5*R*,9*S*,13*R*)-**4b**; (5*S*,9*S*,13*S*)-**4c**; (5*R*,9*R*,13*S*)-**4d**; (5*S*,9*R*,13*R*)-**4e**; (5*S*,9*R*,13*S*)-**4f**; (5*R*,9*R*,13*R*)-**4g**; (5*S*,9*S*,13*R*)-**4h**

**Figure S37.** Antibacterial test of compounds **2** and **6**

**Table S4.** The Boltzmann distribution proportion of its dominant conformation of the compound **2** (5*S*,6*S*)

**Table S5.** Compound **3** (*S*) within 3.0 kcal/mol, and the Boltzmann distribution proportion of its dominant conformation

**Figure S38.** Experimental optical rotation of compound **2**

**Figure S39.** Experimental optical rotation of compound **3**

**Table S1** Experimental and calculated  $^{13}\text{C}$  data for possible structures of compounds **1**, **2** and **4** ( $\delta$  in ppm)

| NO. | $\delta_{\text{C}}$ ,<br>Exptl <sup>A</sup> | <b>1</b>                                    |                                                    |                                             |                                                    |                                             |                                                    |                                             |                                                    |
|-----|---------------------------------------------|---------------------------------------------|----------------------------------------------------|---------------------------------------------|----------------------------------------------------|---------------------------------------------|----------------------------------------------------|---------------------------------------------|----------------------------------------------------|
|     |                                             | <b>1a</b>                                   |                                                    | <b>1b</b>                                   |                                                    | <b>1c</b>                                   |                                                    | <b>1d</b>                                   |                                                    |
|     |                                             | $\delta_{\text{C}}$ ,<br>calcd <sup>B</sup> | $\delta_{\text{C}}$ ,<br>$\Delta\delta^{\text{C}}$ |
| 10  | 38.8                                        | 38.3                                        | -0.5                                               | 38.6                                        | -0.2                                               | 37.9                                        | -0.9                                               | 38.6                                        | -0.2                                               |
| 9   | 35.7                                        | 34.9                                        | -0.8                                               | 34.8                                        | -0.9                                               | 34.7                                        | -1.0                                               | 34.8                                        | -0.9                                               |
| 8   | 213.1                                       | 211.8                                       | -1.3                                               | 211.5                                       | -1.6                                               | 211.8                                       | -1.3                                               | 211.4                                       | -1.7                                               |
| 7   | 91.5                                        | 77.7                                        | -13.8                                              | 79.0                                        | -12.5                                              | 77.6                                        | -13.9                                              | 78.9                                        | -12.6                                              |
| 6   | 45.5                                        | 56.8                                        | 11.3                                               | 56.3                                        | 10.8                                               | 56.7                                        | 11.2                                               | 56.6                                        | 11.1                                               |
| 11  | 55.5                                        | 37.8                                        | -17.7                                              | 37.6                                        | -17.9                                              | 37.9                                        | -17.6                                              | 37.6                                        | -17.9                                              |
| 1   | 32.3                                        | 39.7                                        | 7.4                                                | 41.1                                        | 8.8                                                | 39.8                                        | 7.5                                                | 41.1                                        | 8.8                                                |
| 2   | 194.7                                       | 190.4                                       | -4.3                                               | 188.5                                       | -6.2                                               | 190.7                                       | -4.0                                               | 188.4                                       | -6.3                                               |
| 3   | 145                                         | 140.6                                       | -4.4                                               | 141.6                                       | -3.4                                               | 140.6                                       | -4.4                                               | 141.7                                       | -3.3                                               |
| 4   | 121.3                                       | 112.9                                       | -8.4                                               | 105.9                                       | -15.4                                              | 112.8                                       | -8.5                                               | 105.7                                       | -15.6                                              |
| 5   | 25.2                                        | 28.1                                        | 2.9                                                | 28.9                                        | 3.7                                                | 28.2                                        | 3.0                                                | 28.9                                        | 3.7                                                |
| 12  | 24.3                                        | 25.5                                        | 1.2                                                | 30.9                                        | 6.6                                                | 34.2                                        | 9.9                                                | 26.1                                        | 1.8                                                |
| 13  | 24.4                                        | 34.0                                        | 9.6                                                | 26.1                                        | 1.7                                                | 25.6                                        | 1.2                                                | 30.7                                        | 6.3                                                |
| 14  | 26.8                                        | 25.4                                        | -1.4                                               | 26.9                                        | 0.1                                                | 25.3                                        | -1.5                                               | 27.1                                        | 0.3                                                |

| NO. | $\delta_{\text{C}}$ ,<br>exptl <sup>A</sup> | <b>2</b>                                    |                                                    |                                             |                                                    |                                             |                                                    |                                             |                                                    |
|-----|---------------------------------------------|---------------------------------------------|----------------------------------------------------|---------------------------------------------|----------------------------------------------------|---------------------------------------------|----------------------------------------------------|---------------------------------------------|----------------------------------------------------|
|     |                                             | <b>2a</b>                                   |                                                    | <b>2b</b>                                   |                                                    | <b>2c</b>                                   |                                                    | <b>2d</b>                                   |                                                    |
|     |                                             | $\delta_{\text{C}}$ ,<br>calcd <sup>B</sup> | $\delta_{\text{C}}$ ,<br>$\Delta\delta^{\text{C}}$ |
| 9   | 36.5                                        | 37.0                                        | 0.5                                                | 36.5                                        | 0.00                                               | 36.8                                        | 0.3                                                | 37.0                                        | 0.5                                                |
| 8   | 33.8                                        | 34.6                                        | 0.8                                                | 34.3                                        | 0.51                                               | 34.3                                        | 0.5                                                | 34.6                                        | 0.8                                                |
| 7   | 213.4                                       | 220.4                                       | 7.0                                                | 221.2                                       | 7.80                                               | 221.3                                       | 7.9                                                | 220.4                                       | 7.0                                                |
| 6   | 80                                          | 79.8                                        | -0.2                                               | 79.7                                        | -0.34                                              | 79.5                                        | -0.5                                               | 79.8                                        | -0.2                                               |
| 5   | 59.7                                        | 61.5                                        | 1.8                                                | 61.8                                        | 2.09                                               | 61.6                                        | 1.9                                                | 61.5                                        | 1.8                                                |
| 10  | 37                                          | 37.2                                        | 0.2                                                | 36.8                                        | -0.19                                              | 37.0                                        | 0.0                                                | 37.2                                        | 0.2                                                |
| 4   | 37.6                                        | 41.4                                        | 3.8                                                | 42.1                                        | 4.54                                               | 42.0                                        | 4.4                                                | 41.4                                        | 3.8                                                |
| 3   | 150.8                                       | 154.7                                       | 3.9                                                | 155.2                                       | 4.43                                               | 155.3                                       | 4.5                                                | 154.7                                       | 3.9                                                |
| 2   | 146.4                                       | 146.9                                       | 0.5                                                | 146.6                                       | 0.25                                               | 146.6                                       | 0.2                                                | 146.9                                       | 0.5                                                |
| 1   | 34.3                                        | 36.4                                        | 2.1                                                | 36.4                                        | 2.05                                               | 36.0                                        | 1.7                                                | 36.4                                        | 2.1                                                |
| 12  | 24.7                                        | 27.2                                        | 2.5                                                | 27.1                                        | 2.38                                               | 24.6                                        | -0.1                                               | 27.2                                        | 2.5                                                |
| 11  | 26.8                                        | 25.0                                        | -1.8                                               | 24.4                                        | -2.39                                              | 27.4                                        | 0.6                                                | 25.0                                        | -1.8                                               |
| 14  | 189.5                                       | 188.8                                       | -0.7                                               | 188.9                                       | -0.61                                              | 188.8                                       | -0.7                                               | 188.8                                       | -0.7                                               |
| 13  | 25.2                                        | 25.8                                        | 0.6                                                | 26.2                                        | 1.03                                               | 26.3                                        | 1.1                                                | 25.8                                        | 0.6                                                |

<sup>A</sup>Recorded in  $\text{CDCl}_3$  at 150Hz. <sup>B</sup>Calculated in chloroform. <sup>C</sup> $\Delta\delta = \delta_{\text{calcd}} - \delta_{\text{exptl}}$

| NO. | $\delta_{\text{C}}$ ,<br>Exptl <sup>A</sup> | <b>4</b>  |           |           |           |
|-----|---------------------------------------------|-----------|-----------|-----------|-----------|
|     |                                             | <b>4a</b> | <b>4b</b> | <b>4c</b> | <b>4d</b> |

|    |       | $\delta_c$ ,<br>calcd <sup>B</sup> | $\delta_c$ ,<br>$\Delta\delta^C$ |
|----|-------|------------------------------------|----------------------------------|------------------------------------|----------------------------------|------------------------------------|----------------------------------|------------------------------------|----------------------------------|
| 6  | 207.4 | 208.8                              | 1.4                              | 209.9                              | 2.5                              | 203.9                              | -3.5                             | 206.0                              | -1.4                             |
| 5  | 50.6  | 48.5                               | -2.1                             | 46.3                               | -4.3                             | 48.2                               | -2.4                             | 50.3                               | -0.3                             |
| 4  | 41.2  | 42.3                               | 1.1                              | 45.4                               | 4.2                              | 52.1                               | 10.9                             | 43.3                               | 2.1                              |
| 9  | 78.6  | 78.8                               | 0.2                              | 78.3                               | -0.3                             | 73.8                               | -4.8                             | 74.3                               | -4.3                             |
| 8  | 165   | 168.1                              | 3.1                              | 169.4                              | 4.4                              | 171.3                              | 6.3                              | 171.3                              | 6.3                              |
| 7  | 131.5 | 129.5                              | -2.0                             | 129.2                              | -2.3                             | 131.1                              | -0.4                             | 130.5                              | -1.0                             |
| 3  | 59.1  | 56.0                               | -3.1                             | 55.6                               | -3.5                             | 55.0                               | -4.1                             | 54.0                               | -5.1                             |
| 2  | 38.9  | 37.4                               | -1.5                             | 37.6                               | -1.3                             | 37.2                               | -1.7                             | 37.3                               | -1.6                             |
| 1  | 47.4  | 45.2                               | -2.2                             | 45.4                               | -2.0                             | 45.7                               | -1.7                             | 45.4                               | -2.0                             |
| 15 | 13.2  | 14.4                               | 1.2                              | 14.4                               | 1.2                              | 14.6                               | 1.4                              | 14.5                               | 1.3                              |
| 13 | 75.5  | 73.2                               | -2.3                             | 72.1                               | -3.4                             | 76.2                               | 0.7                              | 74.9                               | -0.6                             |
| 14 | 18    | 16.7                               | -1.3                             | 16.5                               | -1.5                             | 20.3                               | 2.3                              | 16.2                               | -1.8                             |
| 12 | 26.1  | 24.2                               | -1.9                             | 18.7                               | -7.4                             | 25.5                               | -0.6                             | 26.2                               | 0.1                              |
| 10 | 32.1  | 31.4                               | -0.7                             | 31.1                               | -1.0                             | 28.8                               | -3.3                             | 28.8                               | -3.3                             |
| 11 | 31.9  | 31.4                               | -0.5                             | 31.0                               | -0.9                             | 29.2                               | -2.7                             | 29.0                               | -2.9                             |

| NO. | $\delta_c$ ,<br>exptl <sup>A</sup> | <b>4e</b>                          |                                  | <b>4f</b>                          |                                  | <b>4g</b>                          |                                  | <b>4h</b>                          |                                  |
|-----|------------------------------------|------------------------------------|----------------------------------|------------------------------------|----------------------------------|------------------------------------|----------------------------------|------------------------------------|----------------------------------|
|     |                                    | $\delta_c$ ,<br>calcd <sup>B</sup> | $\delta_c$ ,<br>$\Delta\delta^C$ |
| 6   | 207.4                              | 208.9                              | 1.5                              | 209.8                              | 2.4                              | 203.9                              | -3.5                             | 206.2                              | -1.2                             |
| 5   | 50.6                               | 48.7                               | -1.9                             | 46.4                               | -4.2                             | 48.5                               | -2.1                             | 50.1                               | -0.5                             |
| 4   | 41.2                               | 42.1                               | 0.9                              | 45.2                               | 4.0                              | 51.7                               | 10.5                             | 43.3                               | 2.1                              |
| 9   | 78.6                               | 78.8                               | 0.2                              | 78.5                               | -0.1                             | 73.9                               | -4.7                             | 74.2                               | -4.4                             |
| 8   | 165                                | 168.1                              | 3.1                              | 169.4                              | 4.4                              | 171.2                              | 6.2                              | 171.5                              | 6.5                              |
| 7   | 131.5                              | 129.6                              | -1.9                             | 129.0                              | -2.5                             | 131.3                              | -0.2                             | 130.5                              | -1.0                             |
| 3   | 59.1                               | 56.1                               | -3.0                             | 55.6                               | -3.5                             | 55.1                               | -4.0                             | 54.2                               | -4.9                             |
| 2   | 38.9                               | 37.5                               | -1.4                             | 37.7                               | -1.2                             | 37.4                               | -1.5                             | 37.4                               | -1.5                             |
| 1   | 47.4                               | 45.2                               | -2.2                             | 45.6                               | -1.8                             | 45.3                               | -2.1                             | 45.5                               | -1.9                             |
| 15  | 13.2                               | 14.3                               | 1.1                              | 14.4                               | 1.2                              | 14.6                               | 1.4                              | 14.6                               | 1.4                              |
| 13  | 75.5                               | 73.2                               | -2.3                             | 72.3                               | -3.2                             | 76.3                               | 0.8                              | 74.8                               | -0.7                             |
| 14  | 18                                 | 16.9                               | -1.1                             | 16.2                               | -1.8                             | 20.3                               | 2.3                              | 16.3                               | -1.7                             |
| 12  | 26.1                               | 24.3                               | -1.8                             | 18.8                               | -7.3                             | 25.5                               | -0.6                             | 26.2                               | 0.1                              |
| 10  | 32.1                               | 31.4                               | -0.7                             | 31.6                               | -0.5                             | 29.1                               | -3.0                             | 29.1                               | -3.0                             |
| 11  | 31.9                               | 31.4                               | -0.5                             | 31.4                               | -0.5                             | 29.2                               | -2.7                             | 29.0                               | -2.9                             |

<sup>A</sup>Recorded in CD<sub>3</sub>OD at 150Hz. <sup>B</sup>Calculated in methanol. <sup>C</sup> $\Delta\delta = \delta_{\text{calcd}} - \delta_{\text{exptl}}$

**Table S2** Regression analysis of  $^{13}\text{C}$  NMR chemical displacement calculation and experimental value of eight possible configurations of compounds **1**, **2** and **4**

| No.      |           | configuration                       | R <sup>2</sup> | RMSE | DP4+<br>(%) | possibility |
|----------|-----------|-------------------------------------|----------------|------|-------------|-------------|
| <b>1</b> | <b>1a</b> | 6 <i>R</i> ,7 <i>S</i>              | 0.9855         | 8.01 | 56.02       |             |
|          | <b>1b</b> | 6 <i>R</i> ,7 <i>R</i>              | 0.9842         | 8.54 | 8.65        |             |
|          | <b>1c</b> | 6 <i>S</i> ,7 <i>R</i>              | 0.9854         | 8.03 | 28.61       |             |
|          | <b>1d</b> | 6 <i>S</i> ,7 <i>S</i>              | 0.9841         | 8.59 | 6.71        |             |
| <b>2</b> | <b>2a</b> | 5 <i>S</i> ,6 <i>S</i>              | 0.9991         | 2.63 | 73.72       |             |
|          | <b>2b</b> | 5 <i>S</i> ,6 <i>R</i>              | 0.9988         | 2.96 | 0.02        |             |
|          | <b>2c</b> | 5 <i>R</i> ,6 <i>S</i>              | 0.9990         | 2.81 | 15.94       |             |
|          | <b>2d</b> | 5 <i>R</i> ,6 <i>R</i>              | 0.9991         | 2.64 | 10.32       |             |
| <b>4</b> | <b>4a</b> | 5 <i>R</i> ,9 <i>S</i> ,13 <i>S</i> | 0.9993         | 1.83 | 30.72       |             |
|          | <b>4b</b> | 5 <i>R</i> ,9 <i>S</i> ,13 <i>R</i> | 0.9975         | 3.24 | 0.00        |             |
|          | <b>4c</b> | 5 <i>S</i> ,9 <i>S</i> ,13 <i>S</i> | 0.9946         | 4.07 | 0.00        |             |
|          | <b>4d</b> | 5 <i>R</i> ,9 <i>R</i> ,13 <i>S</i> | 0.9978         | 2.87 | 0.00        |             |
|          | <b>4e</b> | 5 <i>S</i> ,9 <i>R</i> ,13 <i>R</i> | 0.9993         | 1.79 | 69.28       |             |
|          | <b>4f</b> | 5 <i>S</i> ,9 <i>R</i> ,13 <i>S</i> | 0.9976         | 3.18 | 0.00        |             |
|          | <b>4g</b> | 5 <i>R</i> ,9 <i>R</i> ,13 <i>R</i> | 0.9948         | 3.97 | 0.00        |             |
|          | <b>4h</b> | 5 <i>S</i> ,9 <i>S</i> ,13 <i>R</i> | 0.9978         | 2.85 | 0.00        |             |

**Table S3** DP4+ Analysis

| No.              | <b>1 (%)</b> |           |           |           | <b>2 (%)</b> |           |           |           |
|------------------|--------------|-----------|-----------|-----------|--------------|-----------|-----------|-----------|
|                  | <b>1a</b>    | <b>1b</b> | <b>1c</b> | <b>1d</b> | <b>2a</b>    | <b>2b</b> | <b>2c</b> | <b>2d</b> |
| sDP4+ (H data)   | -            | -         | -         | -         | -            | -         | -         | -         |
| sDP4+ (C data)   | 56.02        | 8.65      | 28.61     | 6.71      | 40.66        | 0.67      | 34.53     | 24.14     |
| sDP4+ (all data) | 56.02        | 8.65      | 28.61     | 6.71      | 40.66        | 0.67      | 34.53     | 24.14     |
| uDP4+ (H data)   | -            | -         | -         | -         | -            | -         | -         | -         |
| uDP4+ (C data)   | -            | -         | -         | -         | 66.22        | 1.32      | 16.85     | 15.61     |
| uDP4+ (all data) | -            | -         | -         | -         | 66.22        | 1.32      | 16.85     | 15.61     |
| DP4+ (H data)    | -            | -         | -         | -         | -            | -         | -         | -         |
| DP4+ (C data)    | -            | -         | -         | -         | 73.72        | 0.02      | 15.94     | 10.32     |
| DP4+ (all data)  | -            | -         | -         | -         | 73.72        | 0.02      | 15.94     | 10.32     |
| No.              | <b>4 (%)</b> |           |           |           |              |           |           |           |
|                  | <b>4a</b>    | <b>4b</b> | <b>4c</b> | <b>4d</b> | <b>4e</b>    | <b>4f</b> | <b>4g</b> | <b>4h</b> |
| sDP4+ (H data)   | -            | -         | -         | -         | -            | -         | -         | -         |
| sDP4+ (C data)   | 39.36        | 0.00      | 0.00      | 0.00      | 60.63        | 0.00      | 0.00      | 0.00      |
| sDP4+ (all data) | 39.36        | 0.00      | 0.00      | 0.00      | 60.63        | 0.00      | 0.00      | 0.00      |
| uDP4+ (H data)   | -            | -         | -         | -         | -            | -         | -         | -         |

|                  |       |      |      |      |       |      |      |      |
|------------------|-------|------|------|------|-------|------|------|------|
| data)            |       |      |      |      |       |      |      |      |
| uDP4+ (C data)   | 40.53 | 0.01 | 0.00 | 0.04 | 59.34 | 0.03 | 0.00 | 0.05 |
| uDP4+ (all data) | 40.53 | 0.01 | 0.00 | 0.04 | 59.34 | 0.03 | 0.00 | 0.05 |
| DP4+ (H data)    | -     | -    | -    | -    | -     | -    | -    | -    |
| DP4+ (C data)    | 30.72 | 0.00 | 0.00 | 0.00 | 69.28 | 0.00 | 0.00 | 0.00 |
| DP4+ (all data)  | 30.72 | 0.00 | 0.00 | 0.00 | 69.28 | 0.00 | 0.00 | 0.00 |

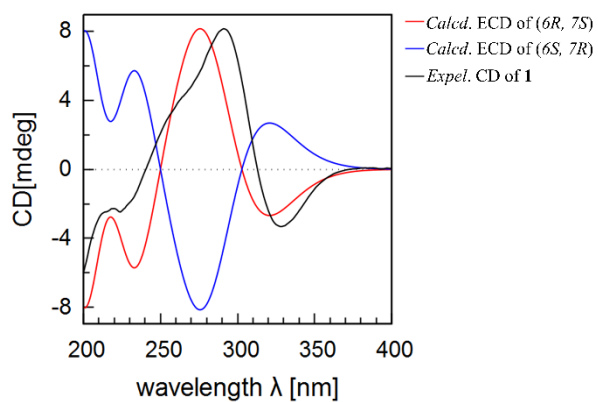

**Figure S1.** Experimental and calculated ECD spectra of compound **1**

Data File: E:\DATA\2021\0623\Gab-30.lcd

| Elmt | Val | Min | Max | Use Adduct |
|------|-----|-----|-----|------|-----|-----|-----|------|-----|-----|-----|------|-----|-----|-----|------------|
| H    | 1   | 10  | 150 | O    | 2   | 0   | 30  | P    | 3   | 0   | 0   | Se   | 2   | 0   | 0   | H          |
| 2H   | 1   | 0   | 0   | F    | 1   | 0   | 0   | S    | 2   | 0   | 0   | Br   | 1   | 0   | 0   | Na         |
| B    | 3   | 0   | 0   | Na   | 1   | 0   | 0   | Cl   | 1   | 0   | 0   | Pd   | 2   | 0   | 0   |            |
| C    | 4   | 10  | 150 | Mg   | 2   | 0   | 0   | Co   | 2   | 0   | 0   | Ag   | 1   | 0   | 0   |            |
| N    | 3   | 0   | 10  | Si   | 4   | 0   | 0   | Cu   | 2   | 0   | 0   | I    | 3   | 0   | 0   |            |

Error Margin (ppm): 5  
 HC Ratio: unlimited  
 Max Isotopes: all  
 MSn Iso RI (%): 75.00

DBE Range: not fixed  
 Apply N Rule: yes  
 Isotope RI (%): 1.00  
 MSn Logic Mode: OR

Electron Ions: both  
 Use MSn Info: yes  
 Isotope Res: 10000  
 Max Results: 20

Event#: 1 MS(E+) Ret. Time : 0.413 -> 0.493 Scan#: 63 -> 75

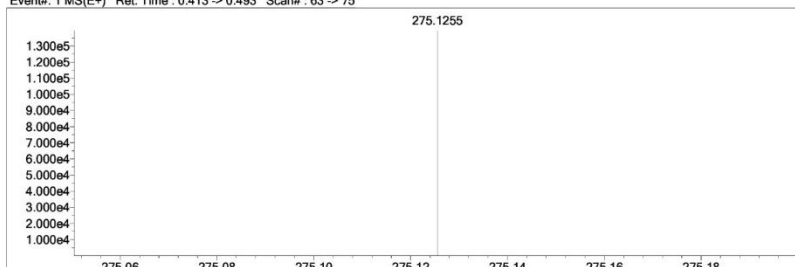

Measured region for 275.1255 m/z

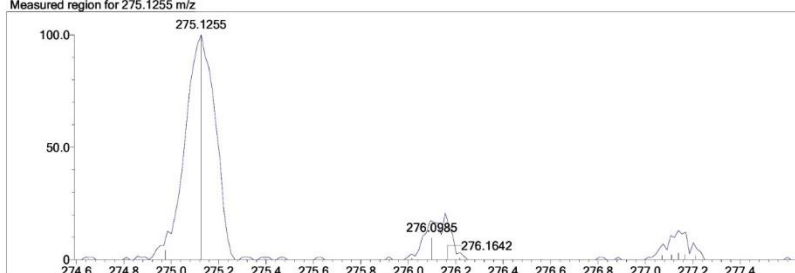

C14 H20 O4 [M+Na]+ : Predicted region for 275.1254 m/z

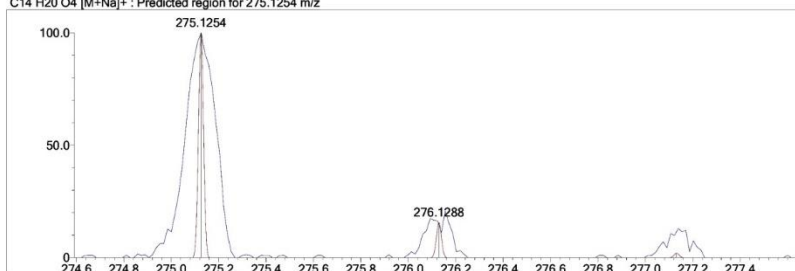

| Formula (M) | Ion     | Meas. m/z | Pred. m/z | Df. (mDa) | Df. (ppm) | DBE |
|-------------|---------|-----------|-----------|-----------|-----------|-----|
| C14 H20 O4  | [M+Na]+ | 275.1255  | 275.1254  | 0.1       | 0.36      | 5.0 |

Figure S2. HR-ESI-MS spectrum of compound 1





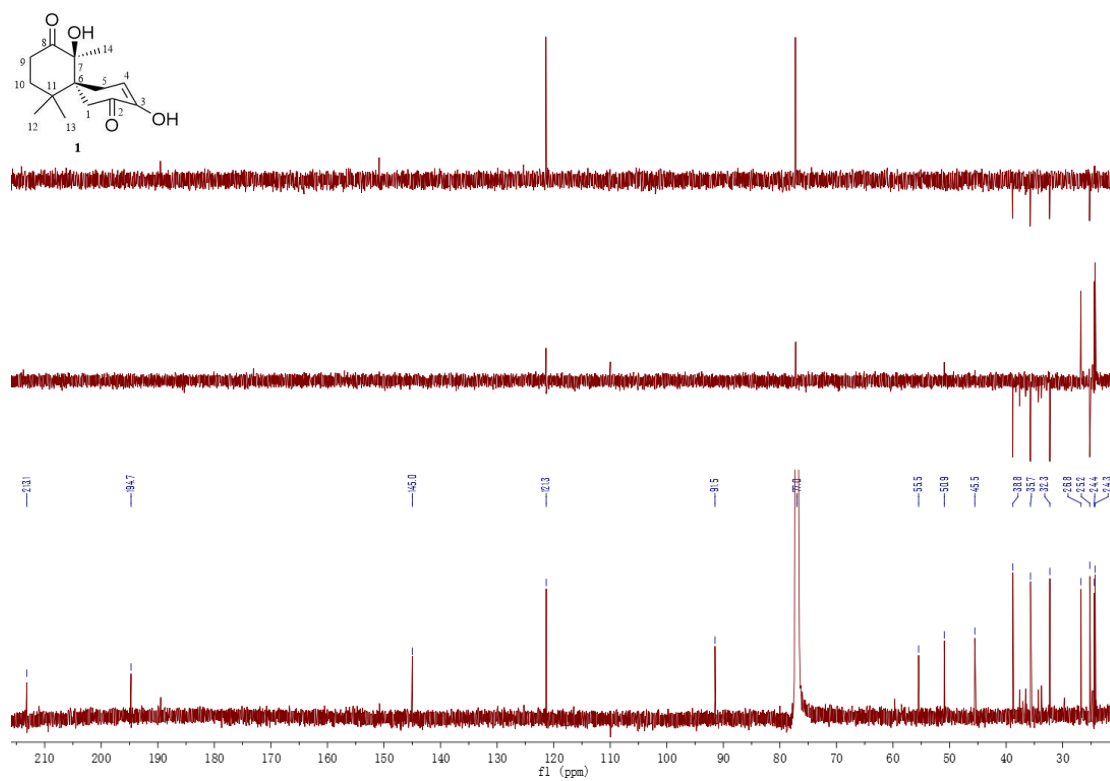

**Figure S5.**  $^{13}\text{C}$  and DEPT spectrum (150MHz,  $\text{CDCl}_3$ ) of **1**

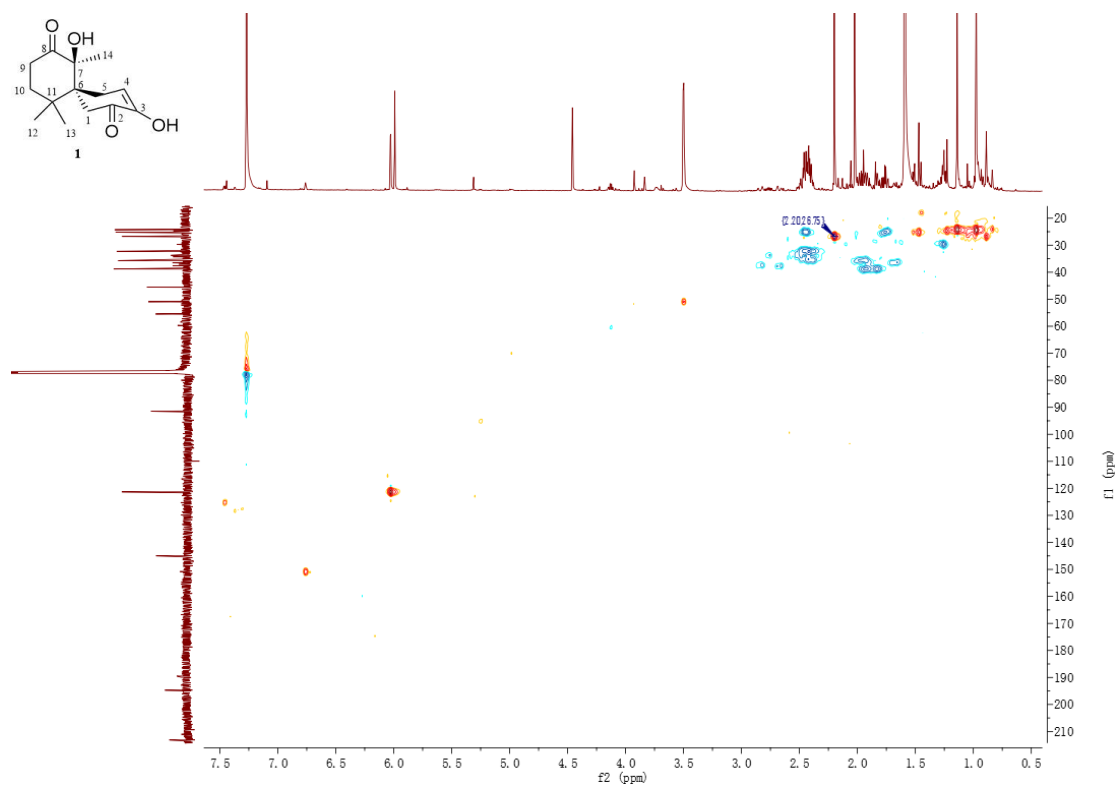

**Figure S6.** HSQC spectrum of **1**

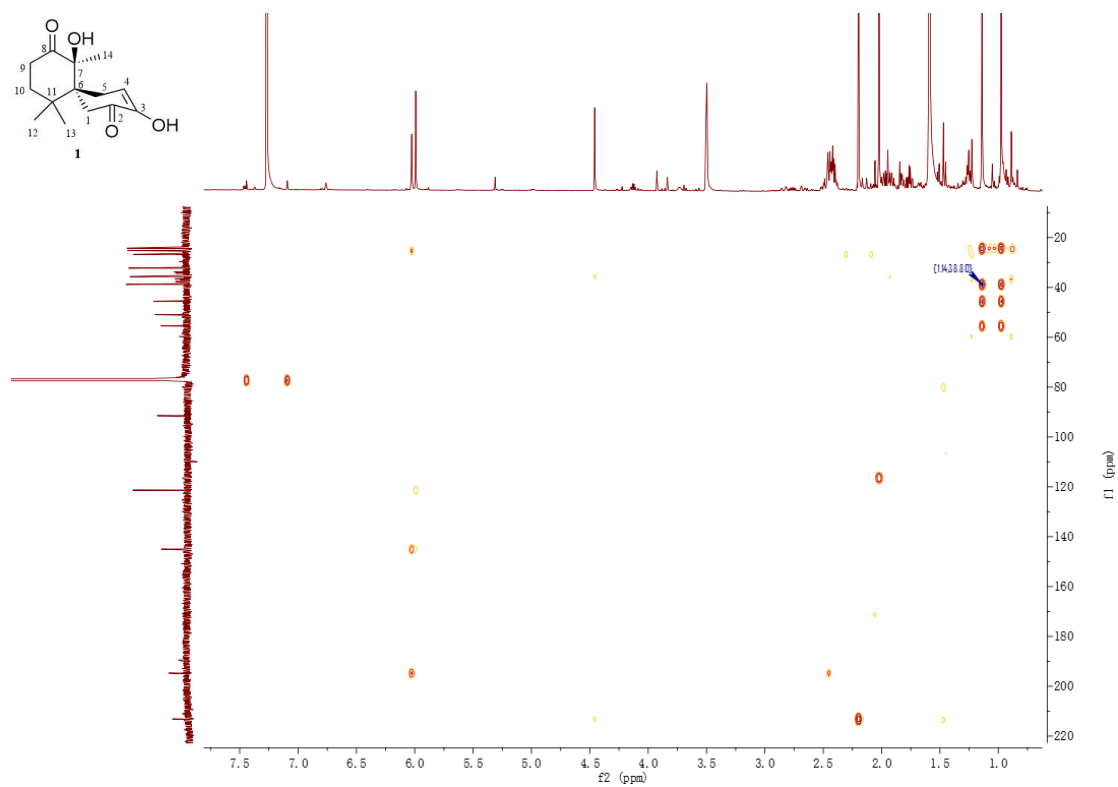

**Figure S7.** HMBC spectrum of **1**

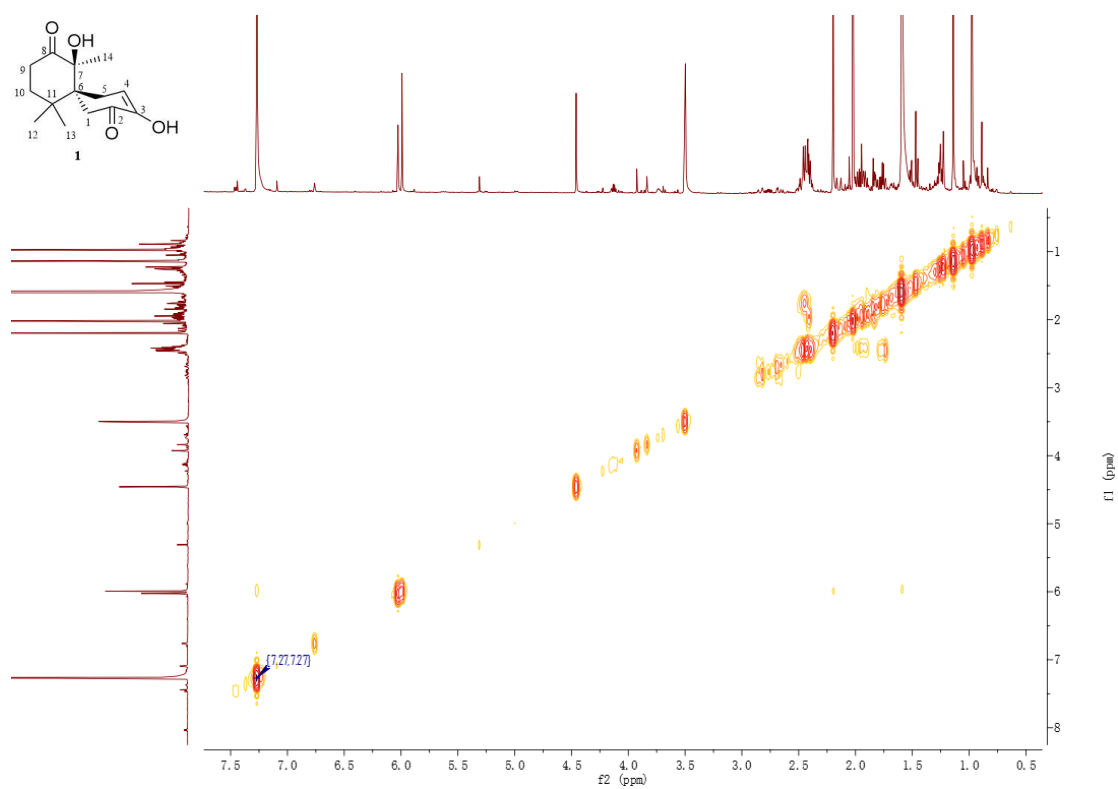

**Figure S8.**  $^1\text{H}$ - $^1\text{H}$  COSY spectrum of **1**

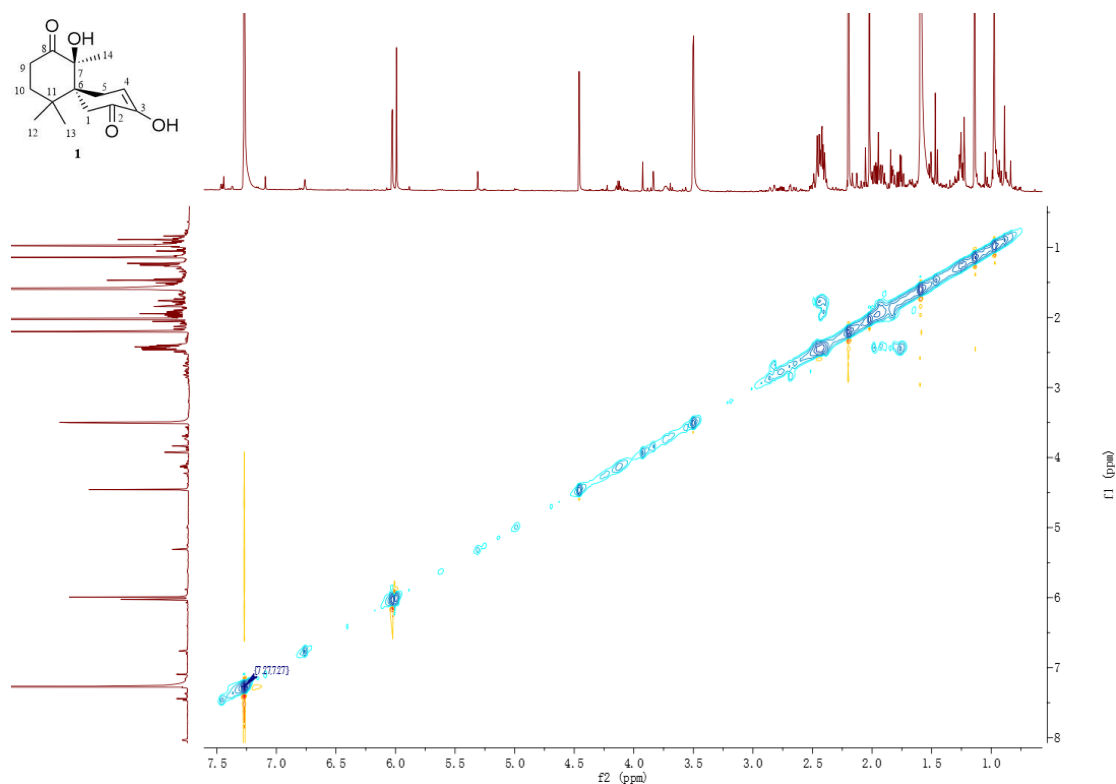

Figure S9. ROESY spectrum of 1

#### Elemental Composition Report

Page 1

#### Single Mass Analysis

Tolerance = 10.0 PPM / DBE: min = -10.0, max = 120.0

Selected filters: None

Monoisotopic Mass, Odd and Even Electron Ions

18 formula(e) evaluated with 1 results within limits (up to 51 closest results for each mass)

Elements Used:

C: 0-200 H: 0-400 O: 1-4

lab27  
13:33:41 21-Jun-2012  
Voltage EI+

KIB  
M120621EA-05AFAMM 53 (4.868)  
236.1408

Autospec Premier  
P776  
4.56

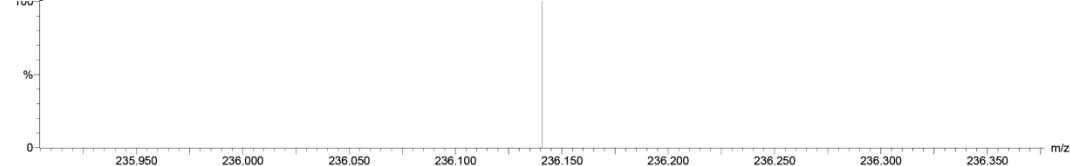

|          |            |      |       |     |           |            |
|----------|------------|------|-------|-----|-----------|------------|
| Minimum: |            |      |       |     |           |            |
| Maximum: | 100.0      | 10.0 | -10.0 |     |           |            |
| Mass     | Calc. Mass | mDa  | PPM   | DBE | i-FIT     | Formula    |
| 236.1408 | 236.1412   | -0.4 | -1.7  | 5.0 | 5546025.5 | C14 H20 O3 |

Figure S10. HR-ESI-MS spectrum of compound 2

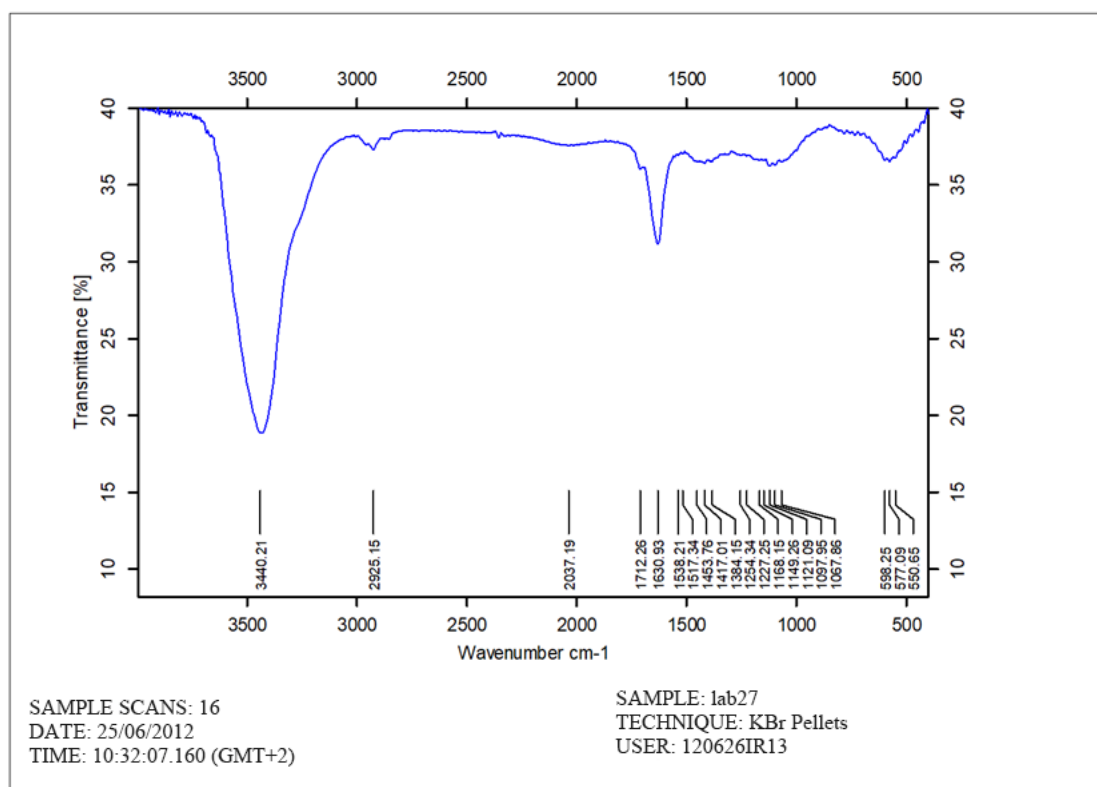

Figure S11. IR spectrum of compound 2

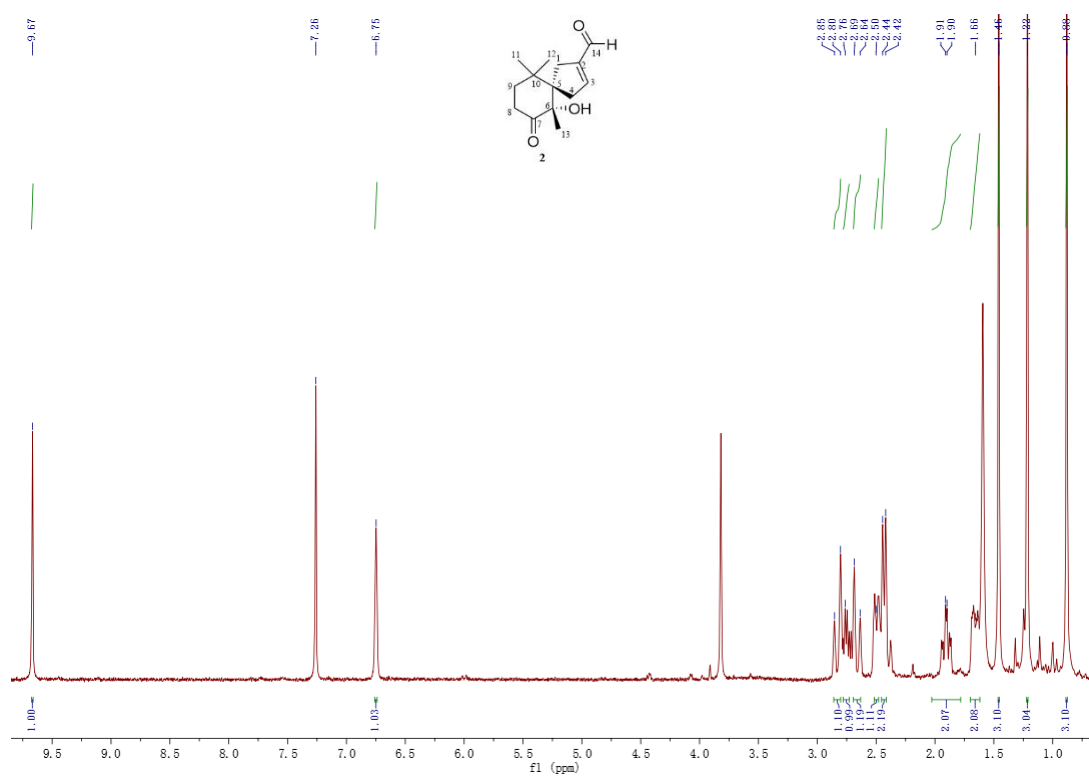

Figure S12. <sup>1</sup>H NMR spectrum (600MHz, CDCl<sub>3</sub>) of 2

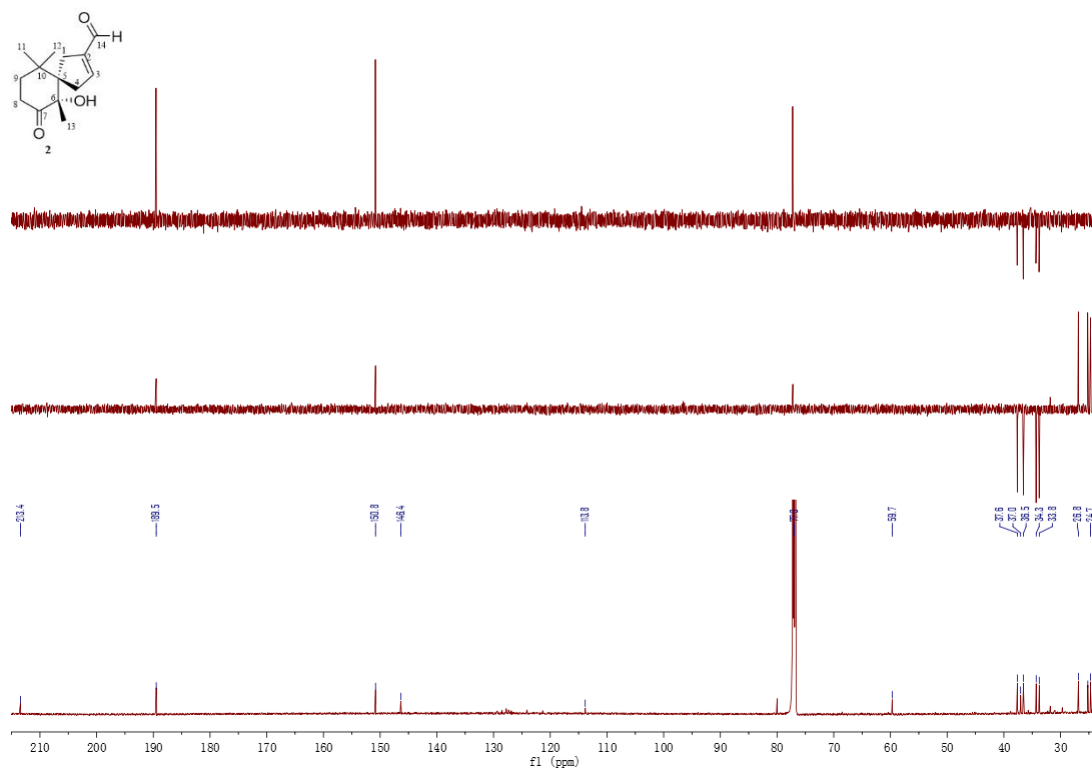

**Figure S13.** <sup>13</sup>C and DEPT spectrum (150MHz, CDCl<sub>3</sub>) of **2**

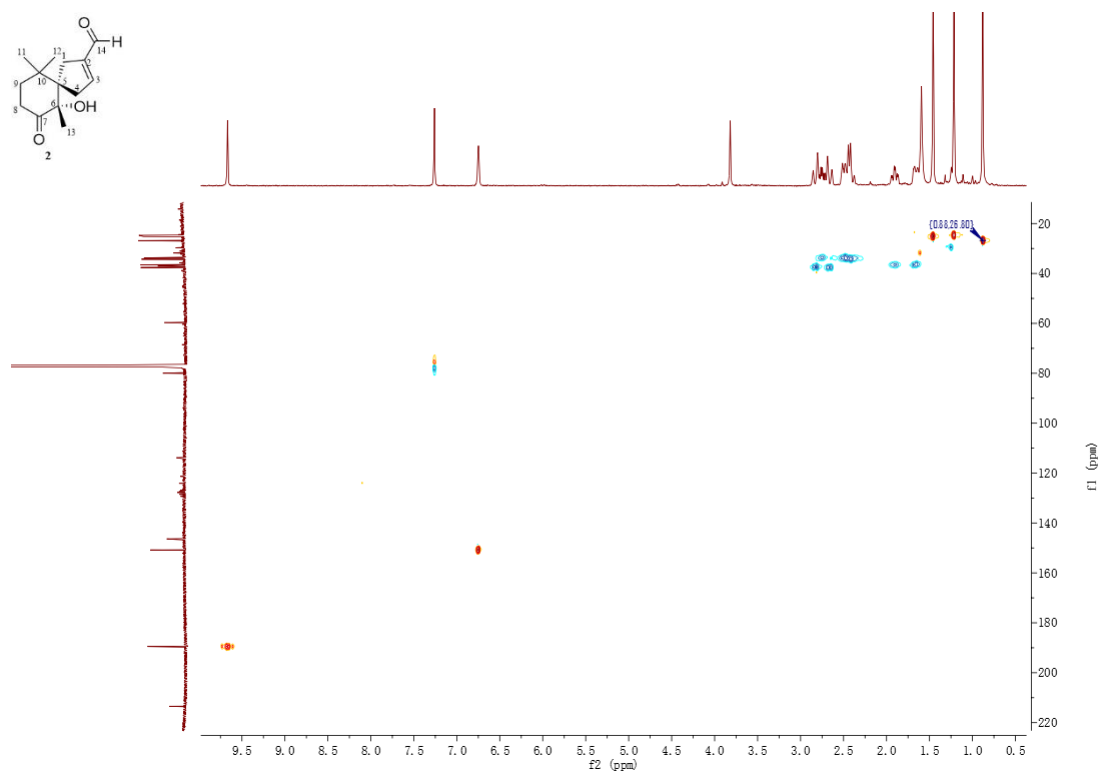

**Figure S14.** HSQC spectrum of **2**

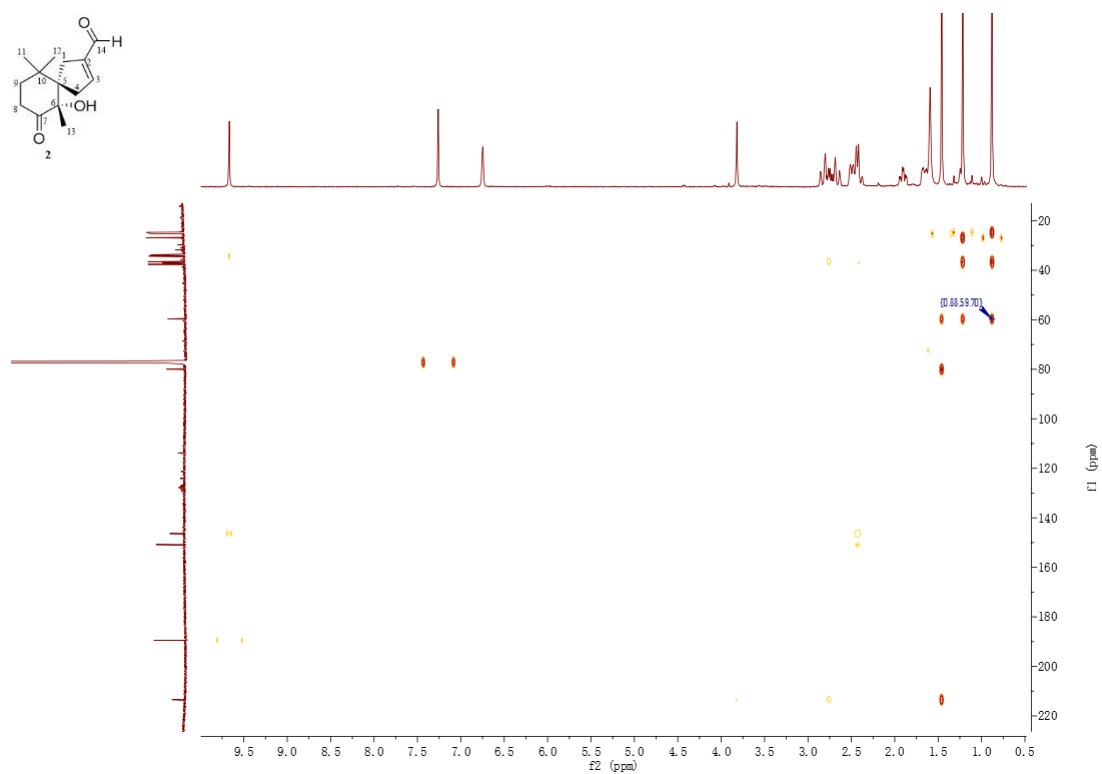

**Figure S15.** HMBC spectrum of **2**

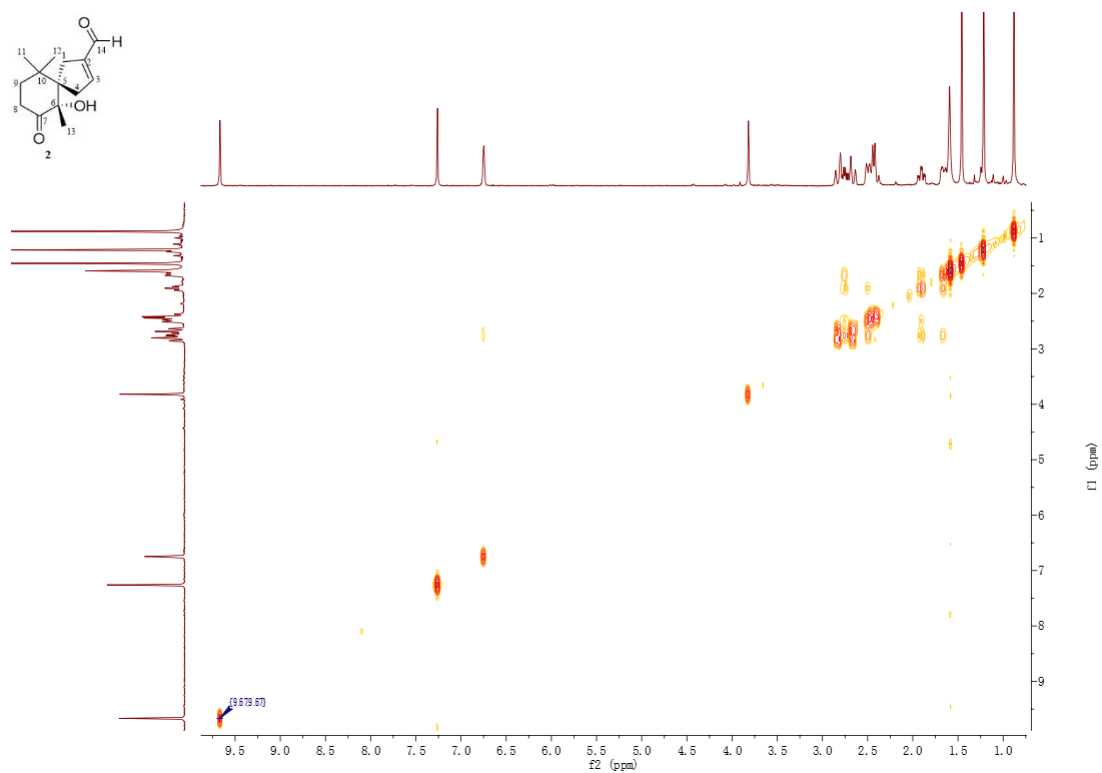

**Figure S16.**  $^1\text{H}$ - $^1\text{H}$  COSY spectrum of **2**

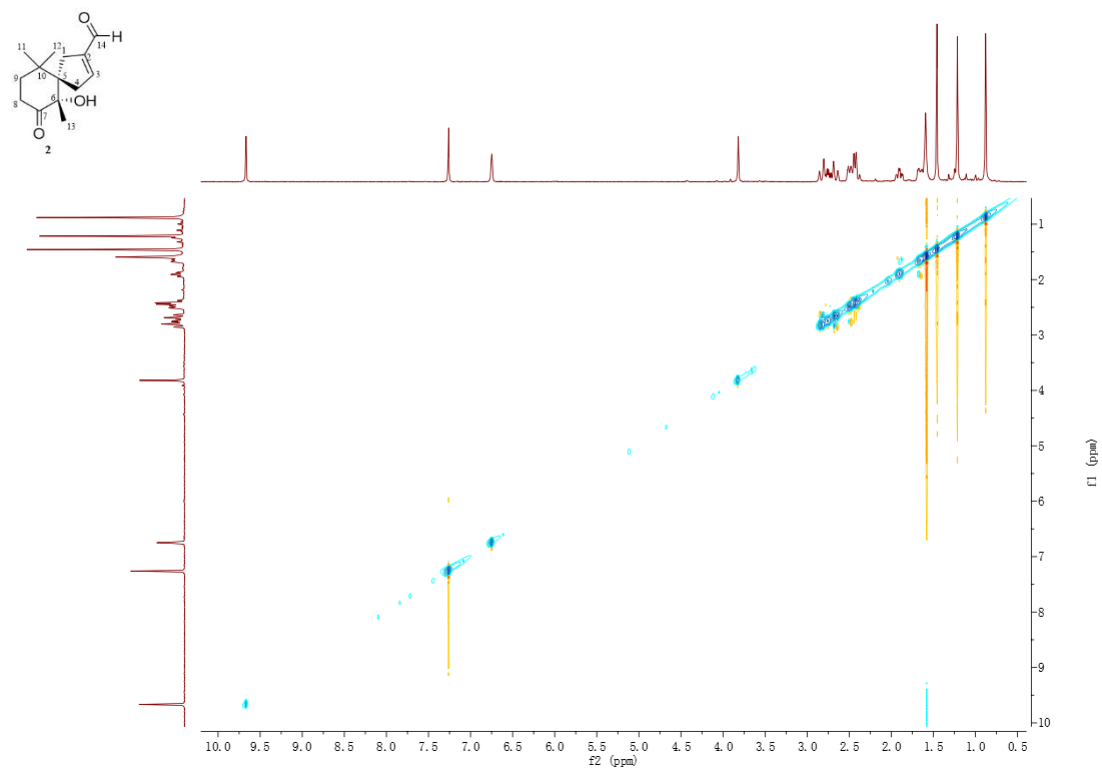

**Figure S17.** ROESY spectrum of **2**

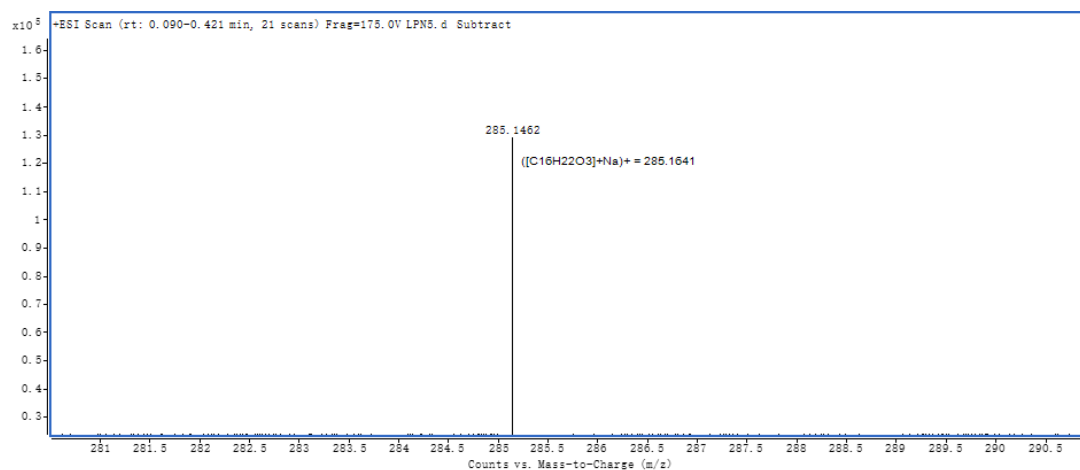

**Figure S18.** HR-ESI-MS spectrum of compound **3**



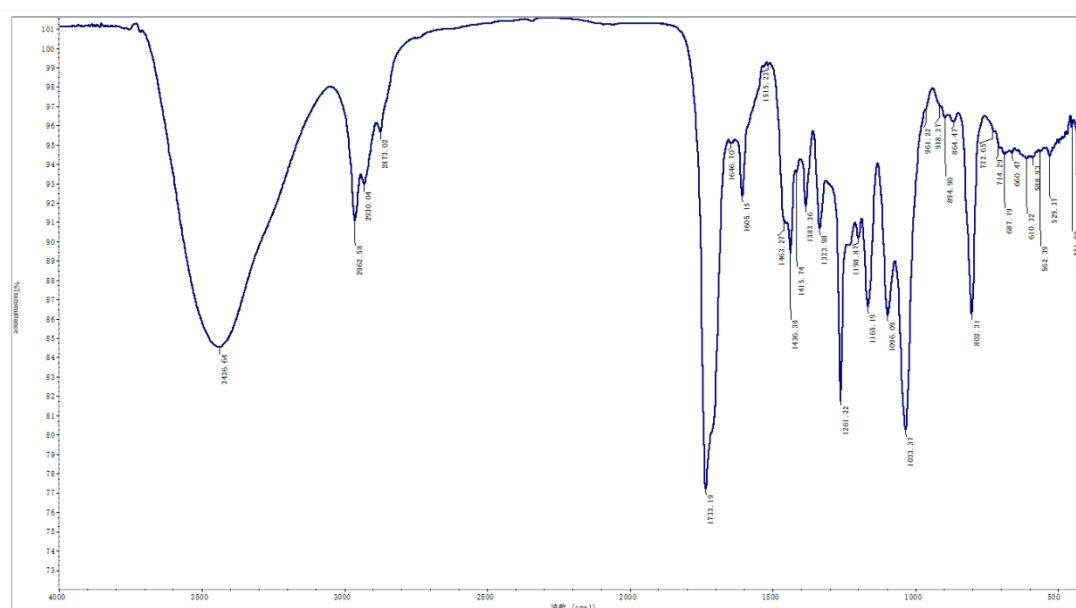

Sample Name: Lpn-5  
KBr Pellets  
Date: 15/11/2018 16:25:28 (GMT+08:00)  
Instrument model: NICOLET iS10  
Software version: OMNIC 9.8.372

Sample Scans: 16  
Background Scans: 16  
resolving Power: 4.000  
Sampling gain: 1.0  
Moving Mirror Speed: 0.4747  
Diaphragm: 80.00

**Figure S19.** IR spectrum of compound **3**

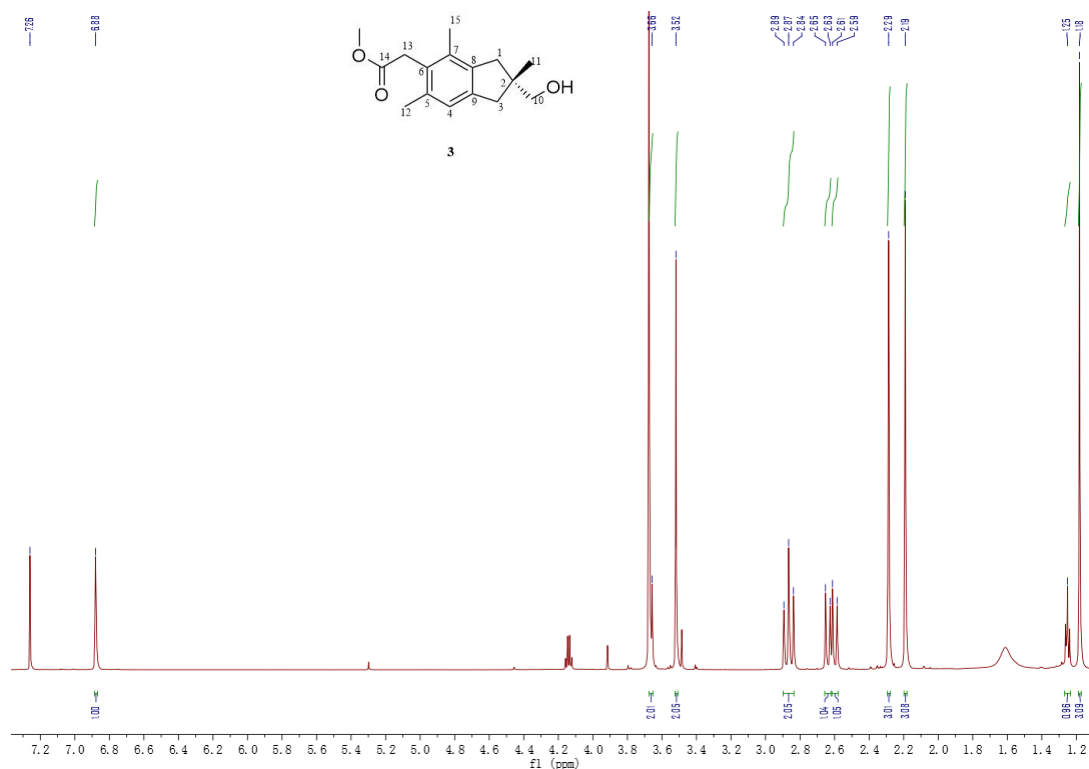

**Figure S20.**  $^1\text{H}$  NMR spectrum (600MHz,  $\text{CDCl}_3$ ) of **3**

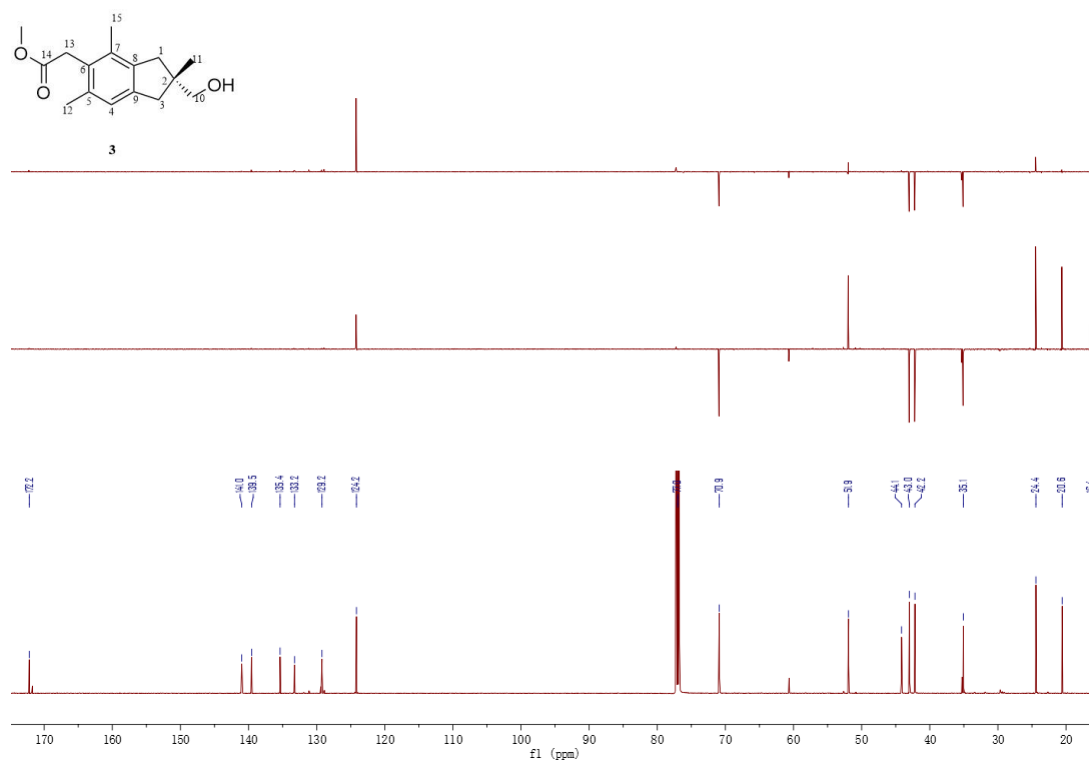

**Figure S21.**  $^{13}\text{C}$  and DEPT spectrum (150MHz,  $\text{CDCl}_3$ ) of **3**

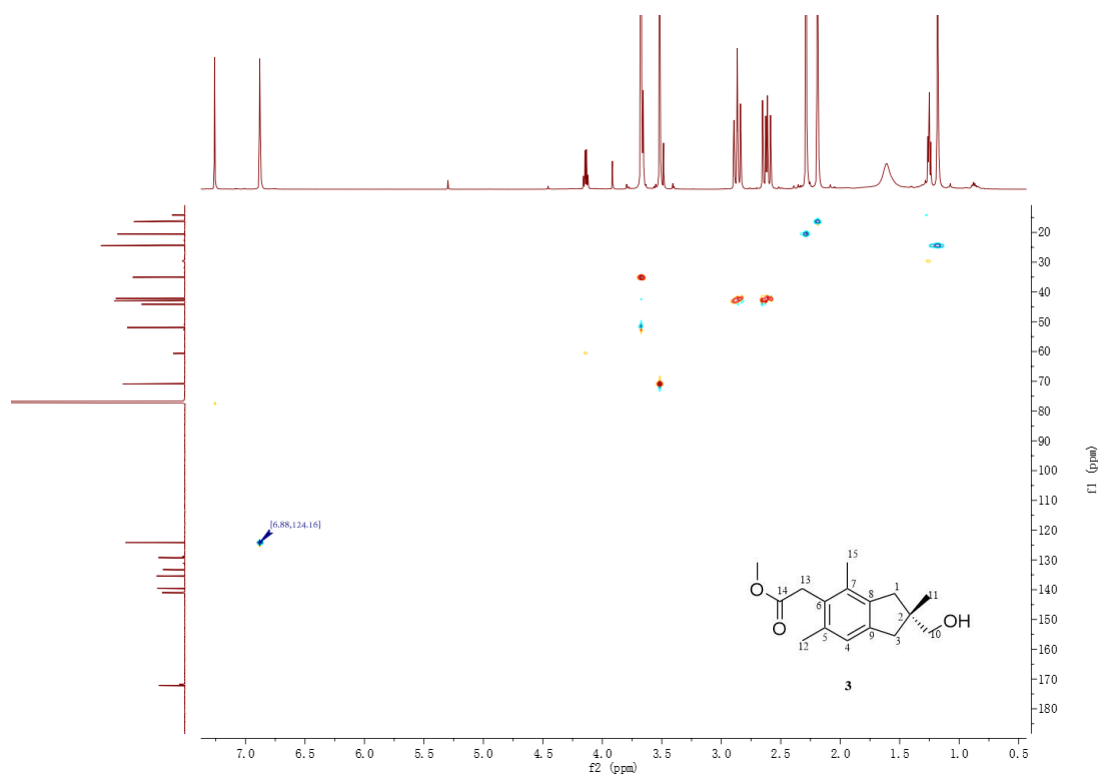

**Figure S22.** HSQC spectrum of **3**

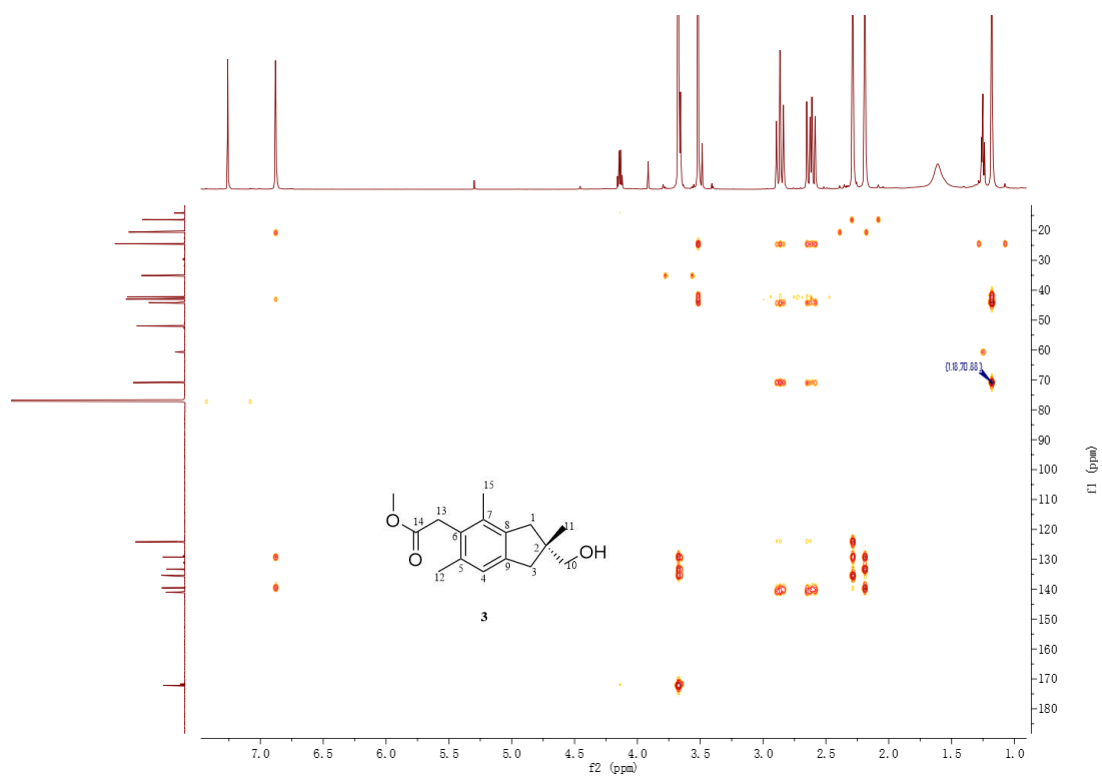

Figure S23. HMBC spectrum of 3

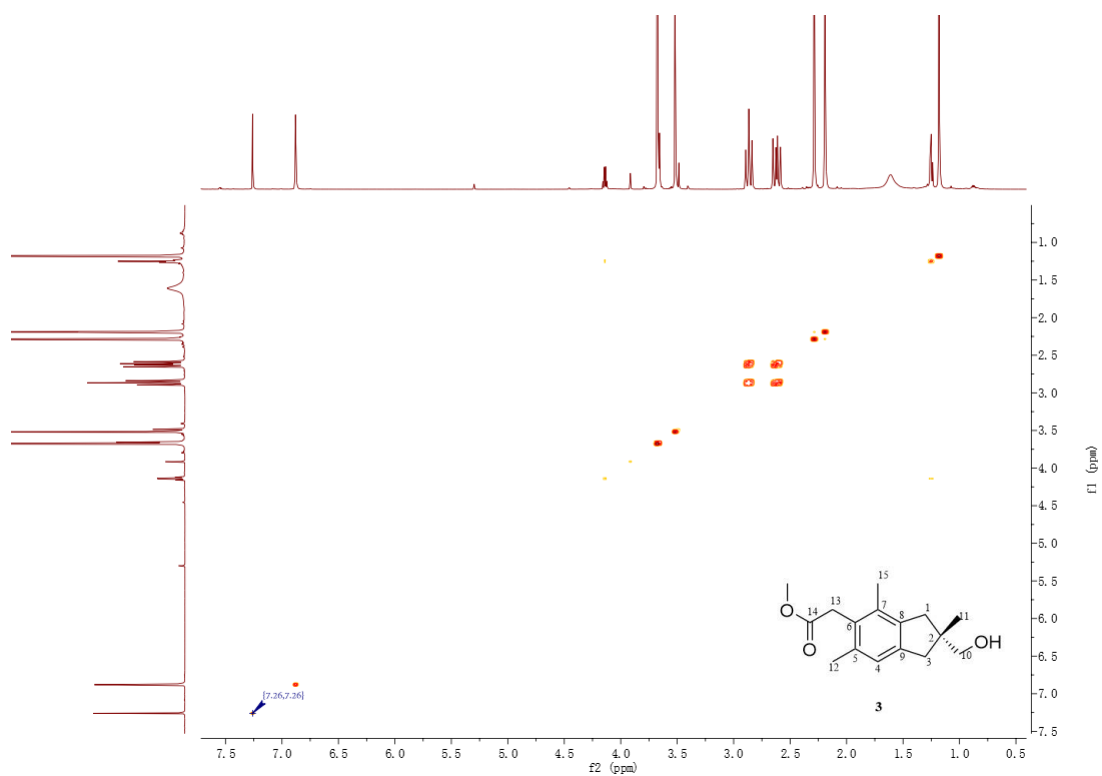

Figure S24.  $^1\text{H}$ - $^1\text{H}$  COSY spectrum of 3

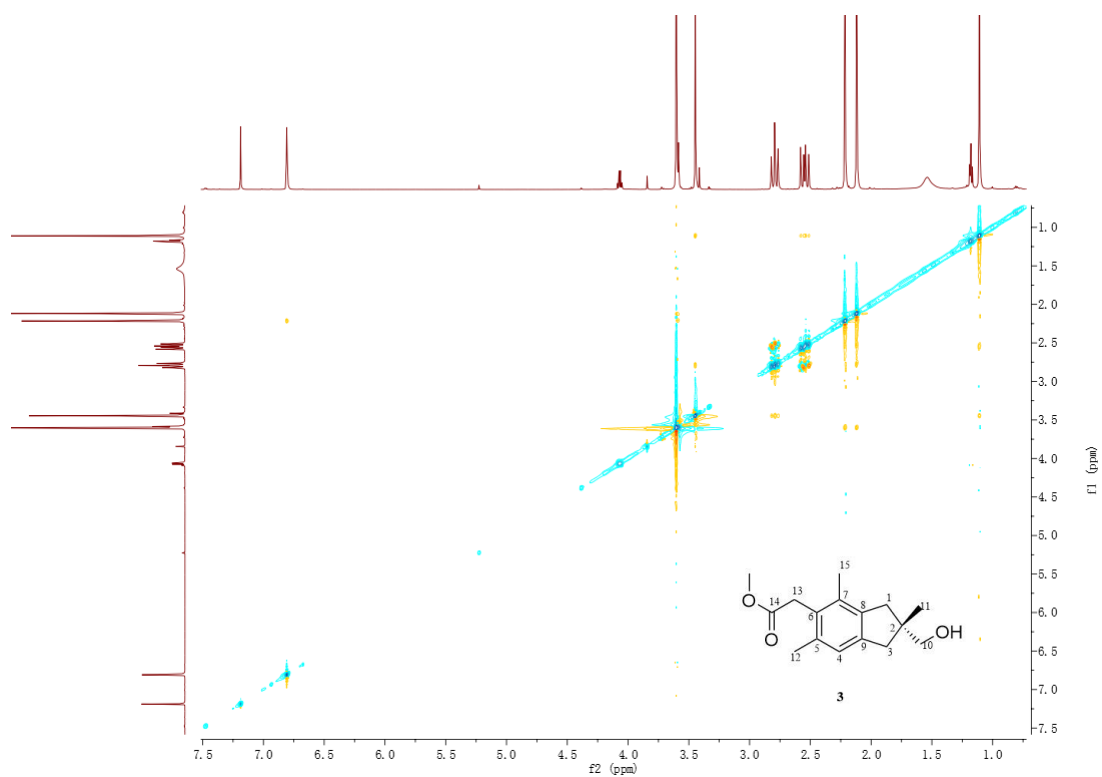

**Figure S25.** ROESY spectrum of **3**

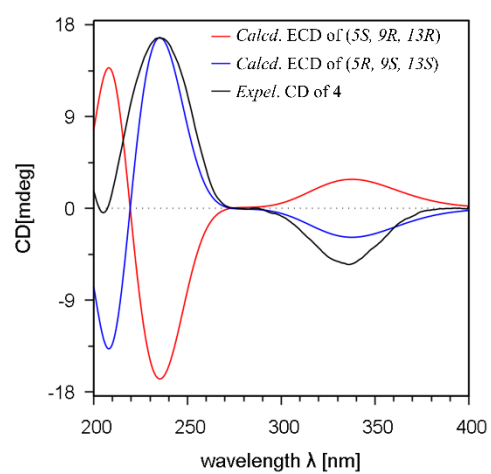

**Figure S26.** Experimental and calculated ECD spectra of compound **4**

Data File: E:\DATA\2018\1010\Lpn-33.lcd

| Elmt | Val. | Min | Max | Use Adduct |
|------|------|-----|-----|------|------|-----|-----|------|------|-----|-----|------|------|-----|-----|------------|
| H    | 1    | 10  | 40  | O    | 2    | 0   | 20  | Si   | 4    | 0   | 0   | Se   | 2    | 0   | 0   | H          |
| C    | 4    | 10  | 50  | F    | 1    | 0   | 0   | S    | 2    | 0   | 0   | Br   | 1    | 0   | 0   |            |
| N    | 3    | 0   | 0   | Na   | 1    | 0   | 0   | Cl   | 1    | 0   | 0   | I    | 3    | 0   | 0   |            |

Error Margin (ppm): 5  
 H/C Ratio: unlimited  
 Max Isotopes: all  
 MSn Iso RI (%): 75.00

DBE Range: -2.0 - 100.0  
 Apply N Rule: yes  
 Isotope RI (%): 1.00  
 MSn Logic Mode: AND

Electron Ions: both  
 Use MSn Info: yes  
 Isotope Res: 10000  
 Max Results: 10

Event#: 2 MS(E-) Ret. Time : 0.333 -&gt; 0.347 Scan#: 52 -&gt; 54

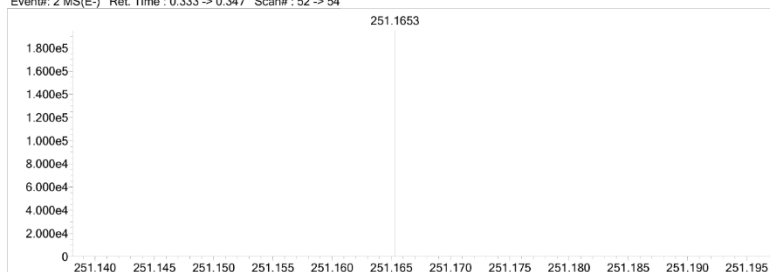

Measured region for 251.1653 m/z

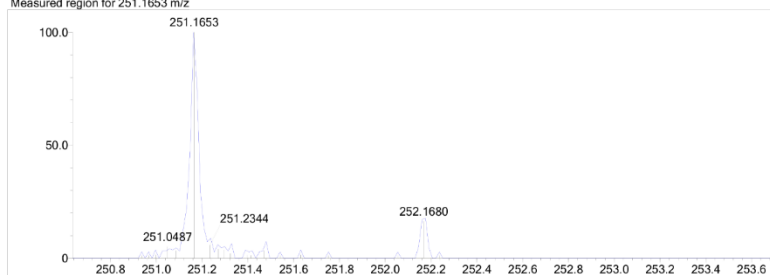

C15 H24 O3 [M-H]- : Predicted region for 251.1653 m/z

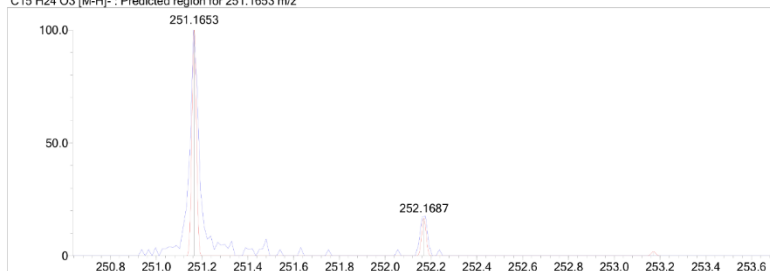

| Formula (M) | Ion    | Meas. m/z | Pred. m/z | Df. (mDa) | Df. (ppm) | DBE |
|-------------|--------|-----------|-----------|-----------|-----------|-----|
| C15 H24 O3  | [M-H]- | 251.1653  | 251.1653  | 0.0       | 0.00      | 4.0 |

Figure S27. HR-ESI-MS spectrum of compound 4

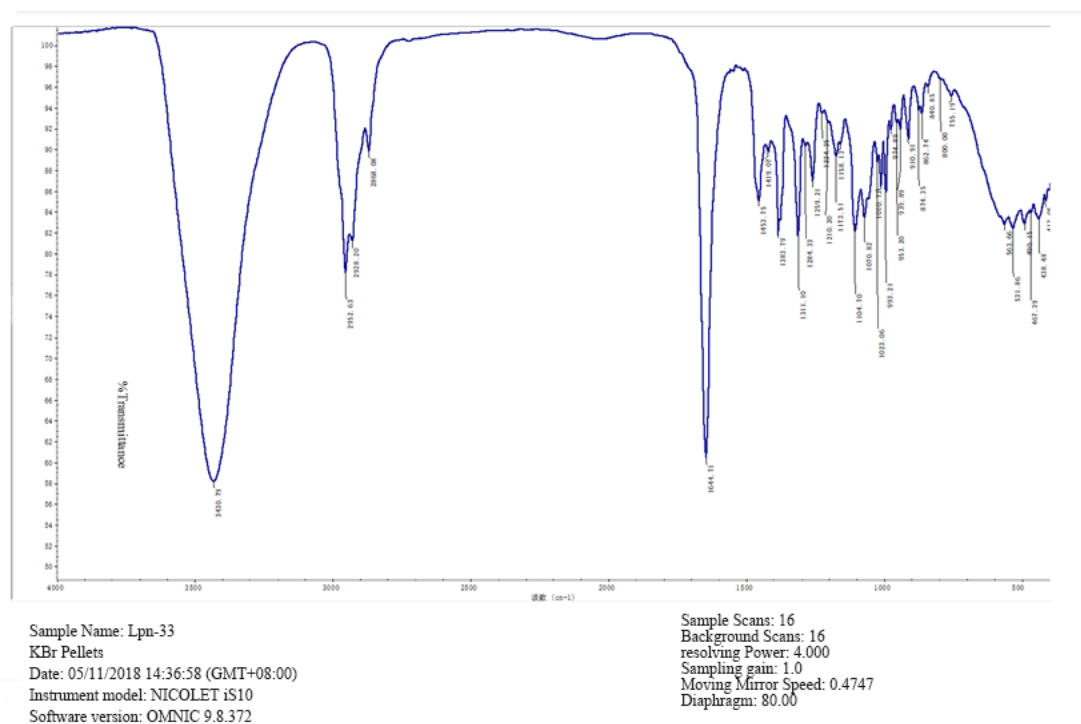

Figure S28. IR spectrum of compound 4

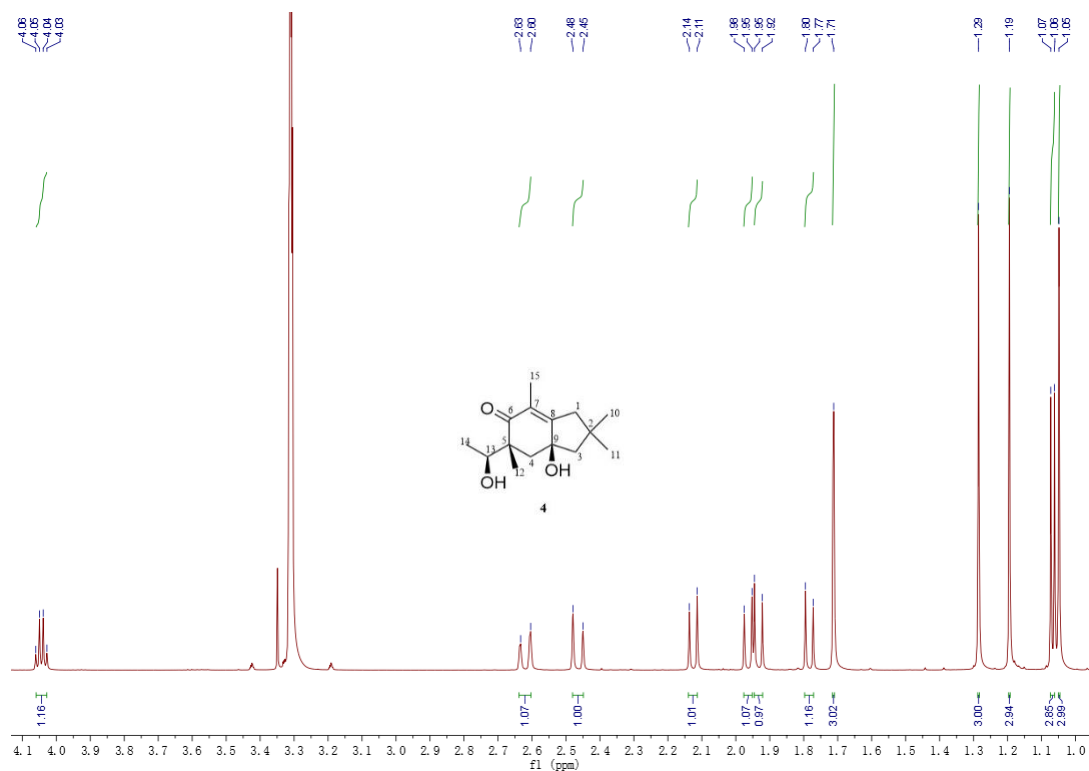

Figure S29.  $^1\text{H}$  NMR spectrum (600MHz,  $\text{CD}_3\text{OD}$ ) of 4

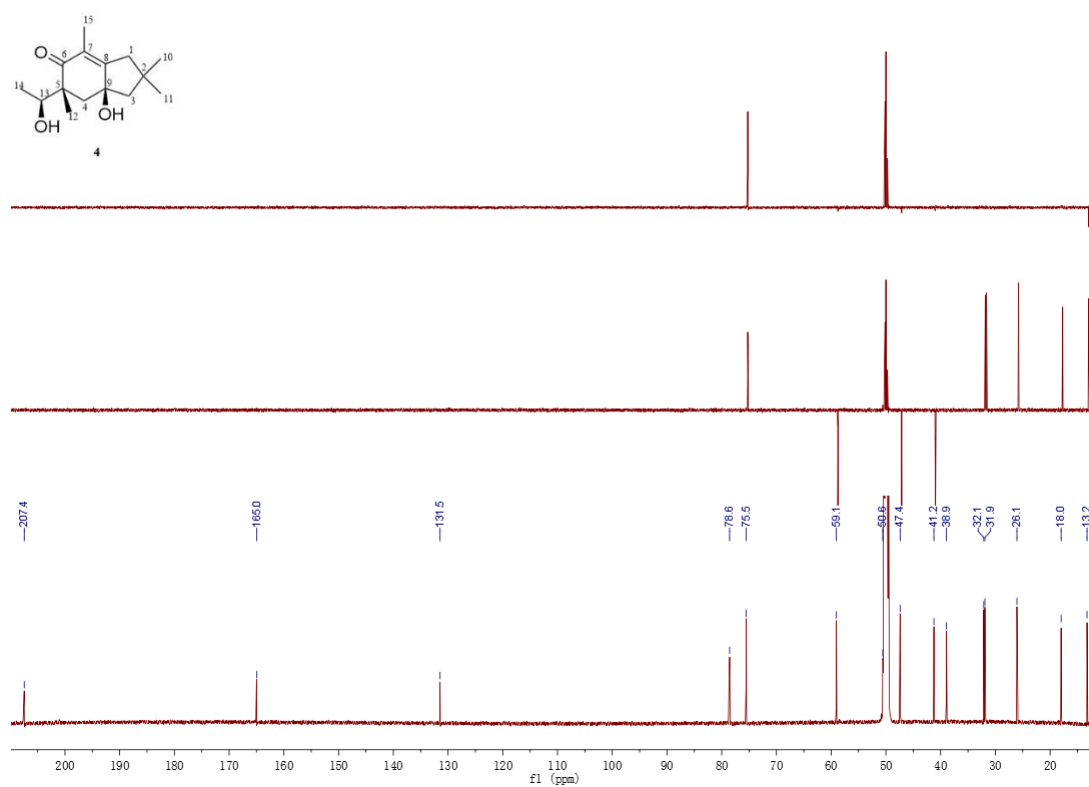

**Figure S30.**  $^{13}\text{C}$  and DEPT spectrum (150MHz,  $\text{CD}_3\text{OD}$ ) of **4**

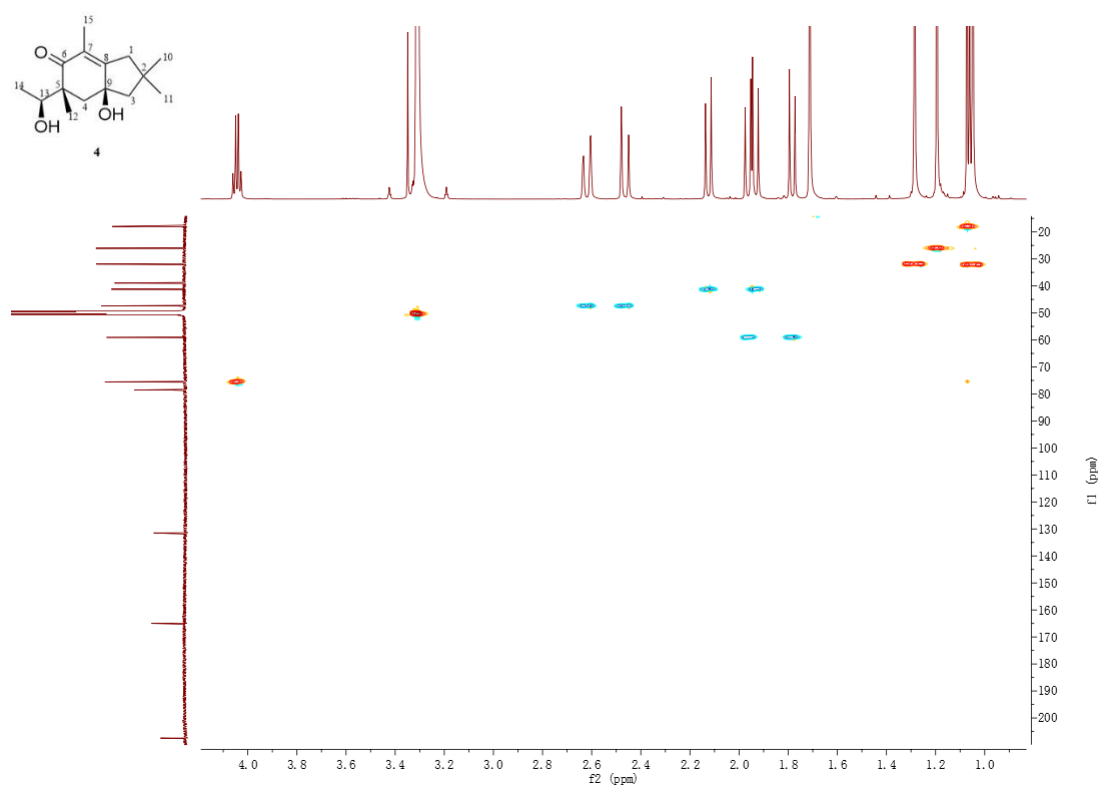

**Figure S31.** HSQC spectrum of **4**

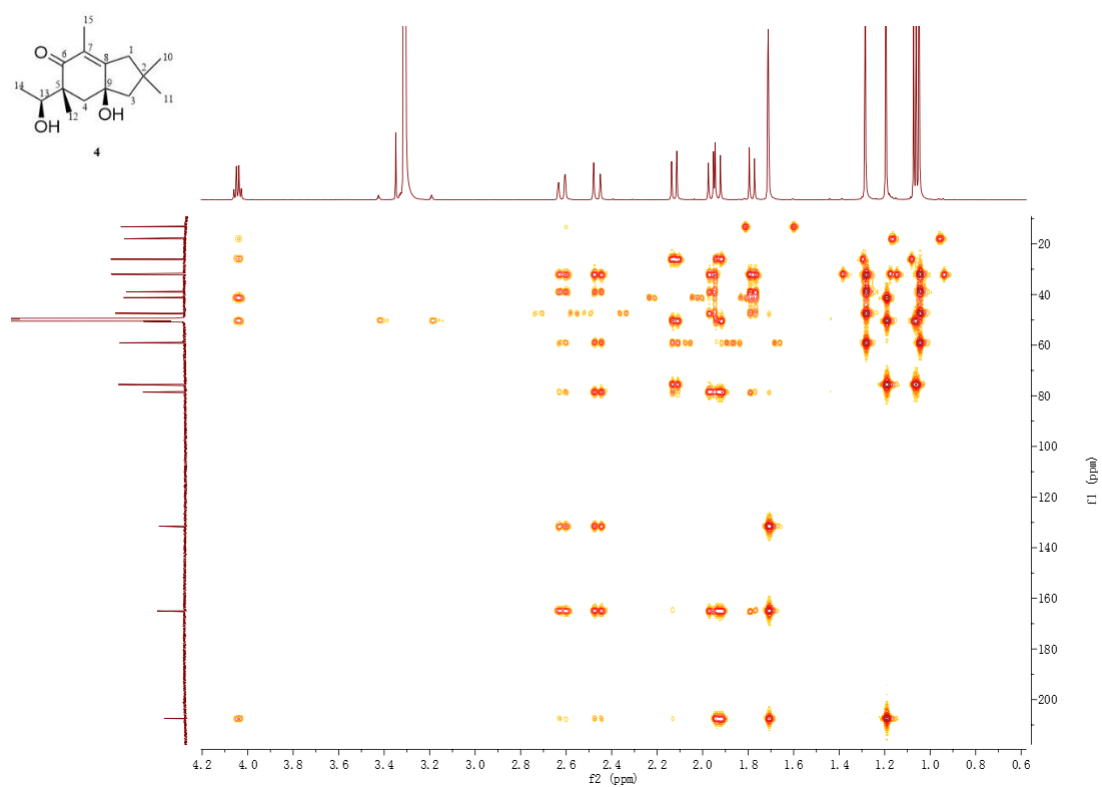

Figure S32. HMBC spectrum of 4

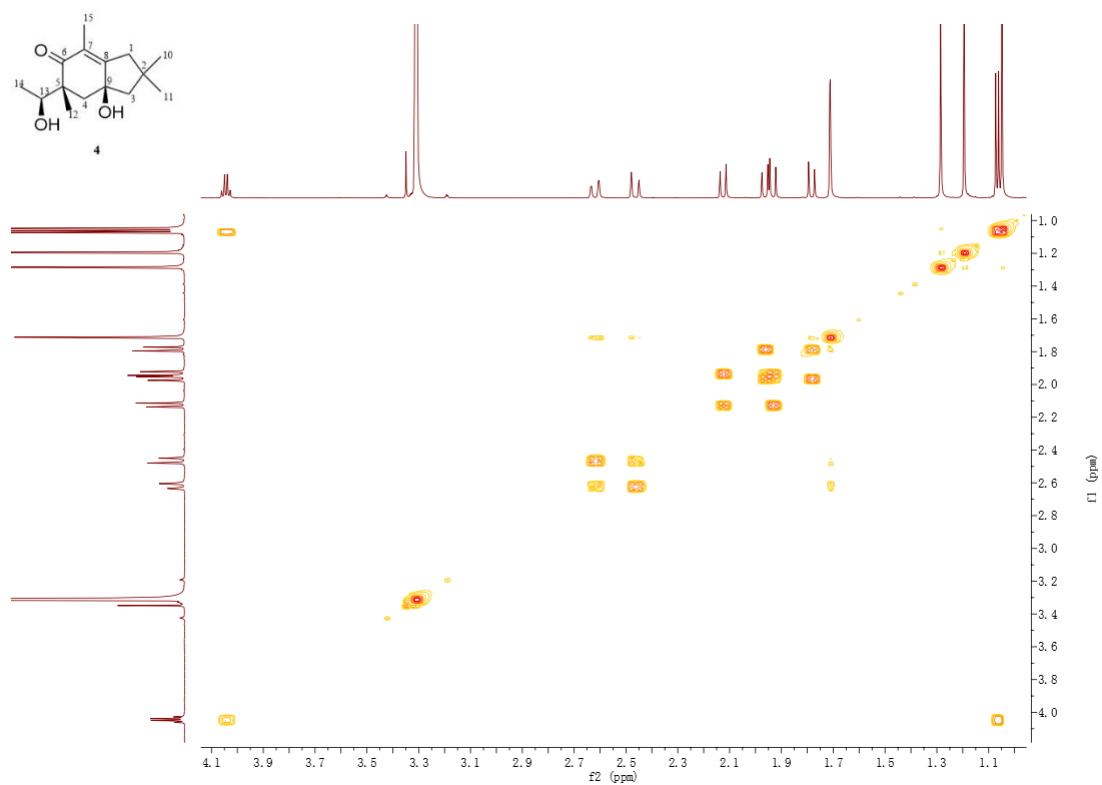



**Figure S33.**  $^1\text{H}$ - $^1\text{H}$  COSY spectrum of **4**

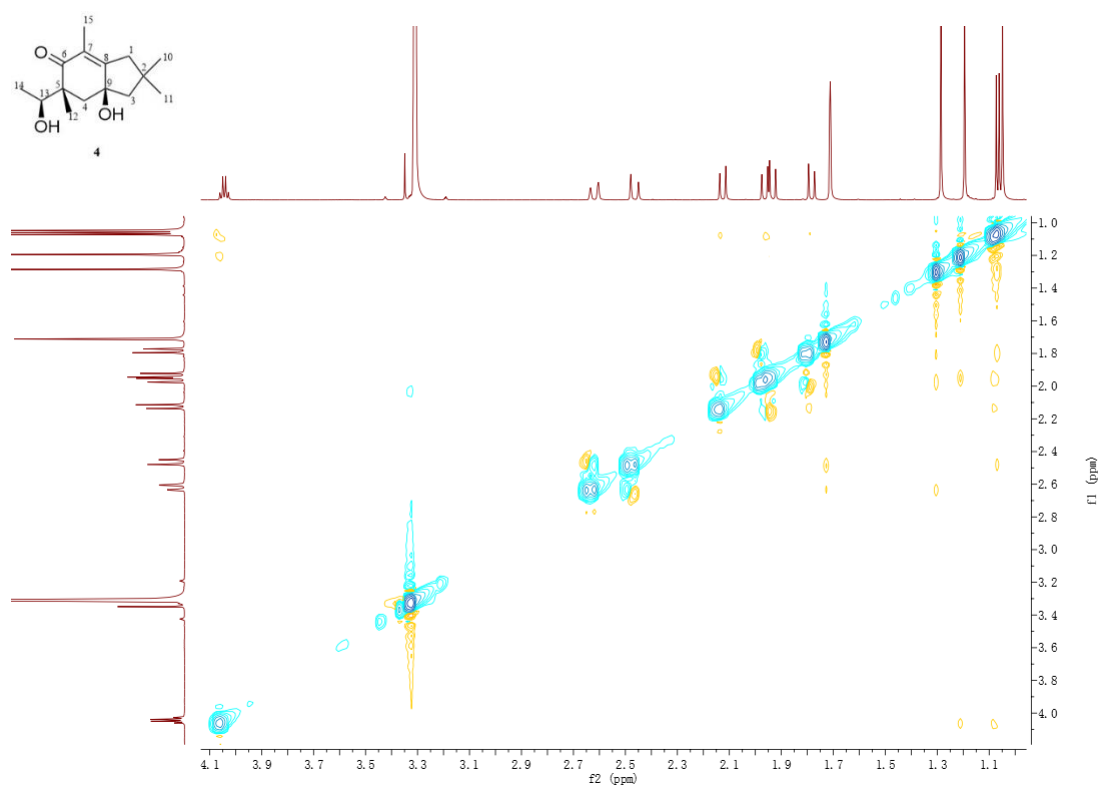

**Figure S34.** ROESY spectrum of **4**

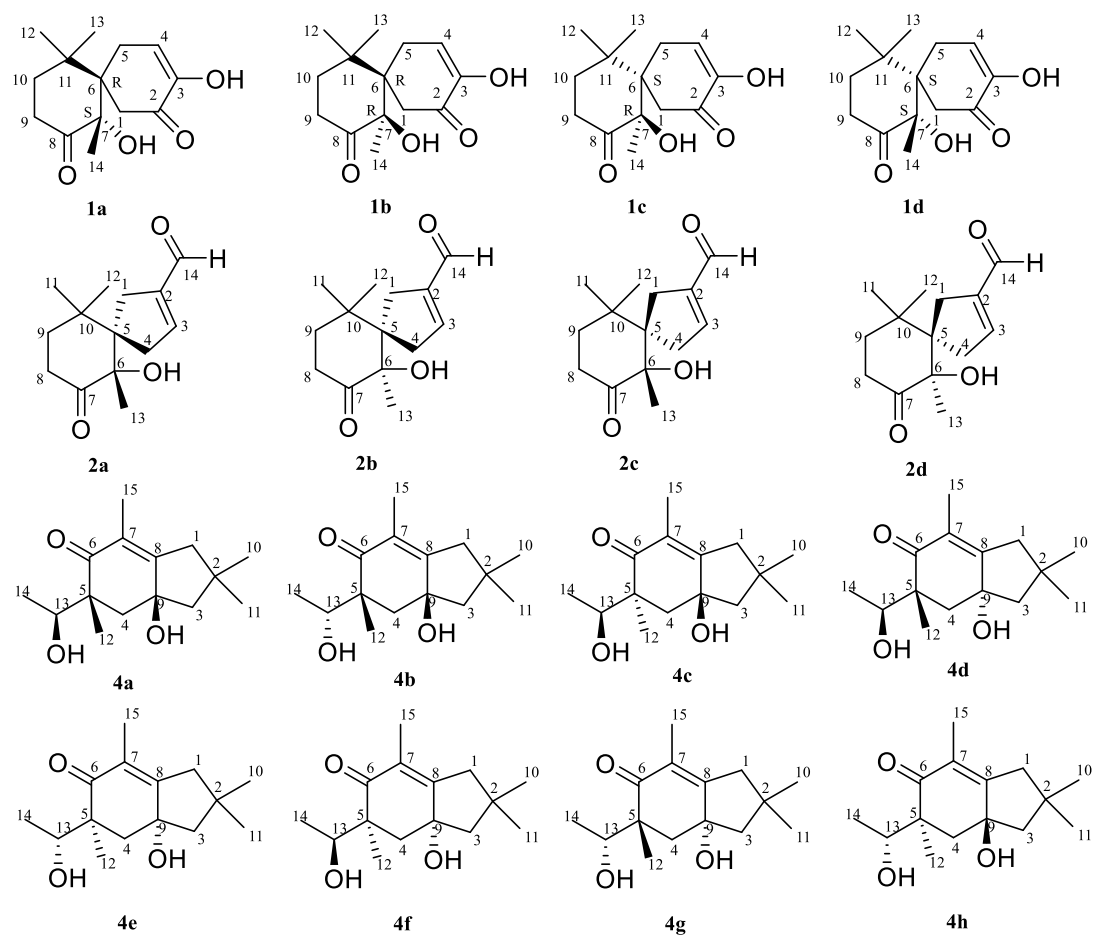

**Figure S35.** There are possible configurations of compounds 1, 2 and 4

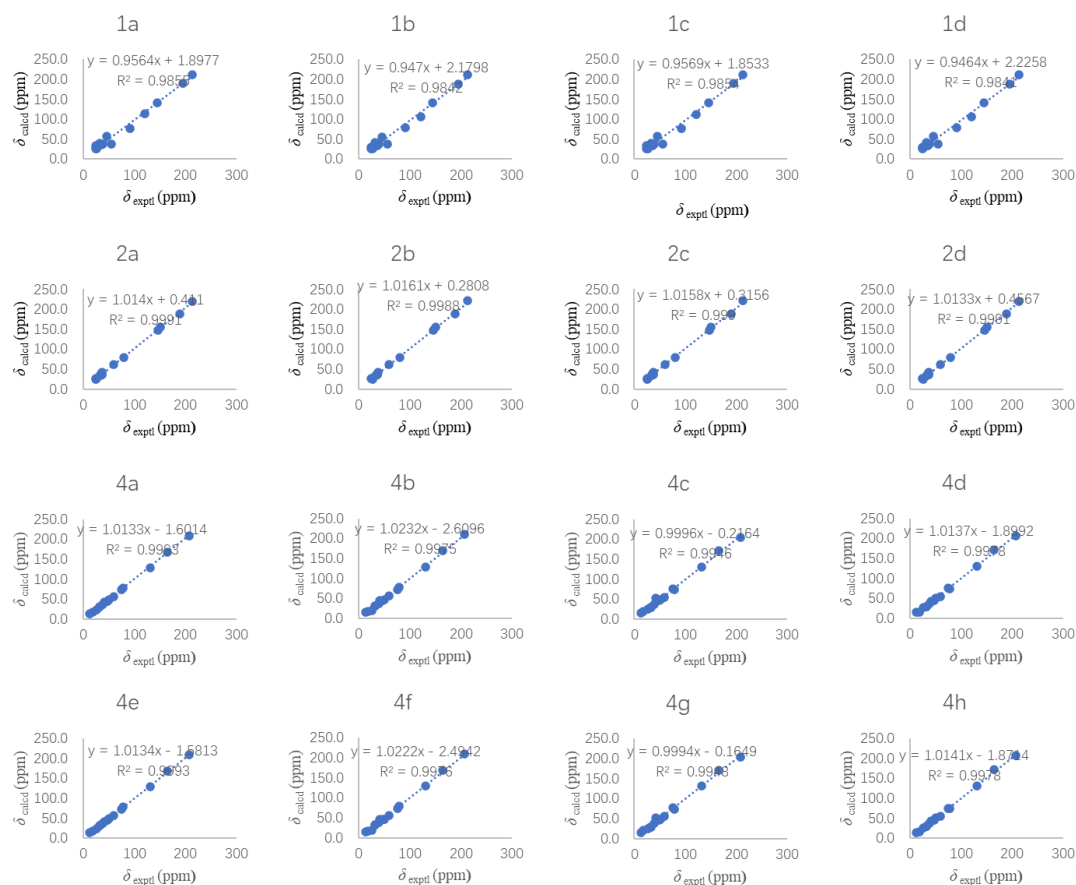

**Figure S36.** Linear correlation plots of calculate-experimental  $^{13}\text{C}$  NMR chemical shift values for (6*R*,7*S*)-**1a**; (6*R*,7*R*)-**1b**; (6*S*,7*R*)-**1c**; (6*S*,7*S*)-**1d**; (5*S*,6*S*)-**2a**; (5*S*,6*R*)-**2b**; (5*R*,6*S*)-**2c**; (5*R*,6*R*)-**2d**; (5*R*,9*S*,13*S*)-**4a**; (5*R*,9*S*,13*R*)-**4b**; (5*S*,9*S*,13*S*)-**4c**; (5*R*,9*R*,13*S*)-**4d**; (5*S*,9*R*,13*R*)-**4e**; (5*S*,9*R*,13*S*)-**4f**; (5*R*,9*R*,13*R*)-**4g**; (5*S*,9*S*,13*R*)-**4h**

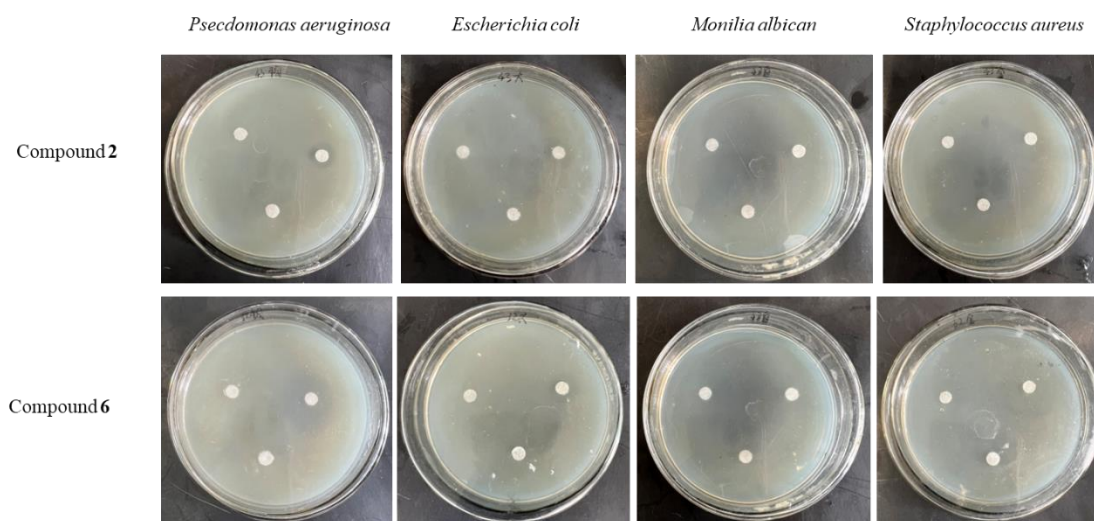

**Figure S37.** Antibacterial test of compounds **2** and **6**

Calculation of optical rotation of compound **2**:

The conformation search found that compound **2** (5*S*,6*S*) has three conformations, among which the Boltzmann distribution ratio and OR value of each conformation are as follows:

**Table S4.** The Boltzmann distribution proportion of its dominant conformation of the compound **2** (5*S*,6*S*)

| Conformation | Weight (%) | OR    |
|--------------|------------|-------|
| 1            | 99.43      | -9.79 |
| 2            | 0.44       | -8.32 |
| 3            | 0.12       | -8.48 |

Calculation of optical rotation of compound **3**:

Through conformation search, it is found that there are 124 conformations with the energy threshold of compound **3** (*S*) within 3.0 kcal/mol, and the Boltzmann distribution proportion of its dominant conformation is shown in table S4:

**Table S5.** Compound **3** (*S*) within 3.0 kcal/mol, and the Boltzmann distribution proportion of its dominant conformation

| Conformation | Weight (%) | OR     | Conformation | Weight (%) | OR     | Conformation | Weight (%) | OR     |
|--------------|------------|--------|--------------|------------|--------|--------------|------------|--------|
| 1            | 1.56       | -7.21  | 62           | 1.07       | 134.05 | 101          | 1.16       | 149.56 |
| 3            | 1.2        | -69.09 | 68           | 1.08       | 68.84  | 102          | 1.41       | 17.51  |

|    |      |         |     |      |         |     |      |         |
|----|------|---------|-----|------|---------|-----|------|---------|
| 4  | 1.43 | -1.8    | 69  | 2    | -3.08   | 103 | 1.65 | 22.33   |
| 5  | 1.13 | 81.11   | 70  | 1.02 | 83.17   | 104 | 1.23 | 87.58   |
| 8  | 1.59 | -6.89   | 72  | 1.63 | -91.08  | 105 | 2.18 | 70.96   |
| 17 | 1.16 | 82.37   | 73  | 1.54 | 82.4    | 106 | 1.69 | -58.1   |
| 18 | 1.43 | 8.31    | 75  | 1.17 | -248.81 | 108 | 1.6  | -41.23  |
| 20 | 1.43 | 31.95   | 76  | 1.11 | 158.47  | 109 | 1.16 | -266.44 |
| 21 | 1.54 | 188.75  | 78  | 0.99 | 60.23   | 110 | 1.39 | -183.21 |
| 24 | 1.24 | -64.94  | 79  | 1.04 | 42.8    | 111 | 1.62 | 25.44   |
| 27 | 1.76 | 84.65   | 81  | 2.02 | -13.43  | 112 | 1.25 | -76.34  |
| 31 | 1.53 | 171.84  | 84  | 1.12 | 155.41  | 113 | 1.43 | -61.62  |
| 37 | 1.49 | 107.52  | 85  | 1.05 | -263.5  | 114 | 1.25 | 97.81   |
| 41 | 1.45 | 15.27   | 89  | 2.16 | 3.49    | 115 | 1.33 | -230.92 |
| 43 | 1.02 | 140.03  | 90  | 2.26 | 166.56  | 116 | 1.42 | 27.8    |
| 44 | 1.02 | 44.13   | 91  | 1.06 | 133.4   | 117 | 1.41 | -164.63 |
| 50 | 1.04 | 73.11   | 93  | 1.03 | 67.55   | 118 | 1.58 | -37.89  |
| 52 | 2.11 | -1.43   | 94  | 1.02 | 40.68   | 119 | 1.31 | -247.35 |
| 53 | 1.17 | -257.65 | 95  | 2.22 | 46.27   | 120 | 1.43 | -125.95 |
| 55 | 1.51 | 113.57  | 96  | 1.56 | -9.98   | 121 | 1.39 | -52.4   |
| 56 | 1.77 | 79.7    | 98  | 2.07 | 78.53   | 122 | 1.42 | -121.11 |
| 57 | 1.27 | 70.01   | 99  | 1.65 | -85.72  | 123 | 1.24 | 101.05  |
| 60 | 1    | 31.15   | 100 | 2.18 | -5.19   | 124 | 1.41 | -120.26 |
| 61 | 1.17 | -253.2  |     |      |         |     |      |         |

The calculation results show that the calculated optical rotation value of **3** (S) is +3.01, while the experimental optical rotation value (as shown in the figure S37) is -2.92. Therefore, it is judged that the absolute configuration of compound **3** is R.

| Optical rotation measurement |          |        |          |                   |                          |                                                      |                          |                          |
|------------------------------|----------|--------|----------|-------------------|--------------------------|------------------------------------------------------|--------------------------|--------------------------|
| Model : P-1020 (A060460638)  |          |        |          |                   |                          |                                                      |                          |                          |
| No.                          | Sample   | Mode   | Data     | Monitor Blank     | Temp. Cell<br>Temp Point | Date<br>Comment<br>Sample Name                       | Light Filter<br>Operator | Cycle Time<br>Integ Time |
| No.1                         | 17 (1/3) | Sp.Rot | -10.8750 | -0.0174<br>0.0000 | 23.6<br>50.00<br>Cell    | Thu Jul 05 16:19:01 2012<br>0.00320g/mlMeOH<br>LAB27 | Na<br>589nm              | 2 sec<br>10 sec          |
| No.2                         | 17 (2/3) | Sp.Rot | -10.1880 | -0.0163<br>0.0000 | 23.6<br>50.00<br>Cell    | Thu Jul 05 16:19:14 2012<br>0.00320g/mlMeOH<br>LAB27 | Na<br>589nm              | 2 sec<br>10 sec          |
| No.3                         | 17 (3/3) | Sp.Rot | -9.6880  | -0.0155<br>0.0000 | 23.6<br>50.00<br>Cell    | Thu Jul 05 16:19:28 2012<br>0.00320g/mlMeOH<br>LAB27 | Na<br>589nm              | 2 sec<br>10 sec          |

**Figure S38.** Experimental optical rotation of compound **2**

|                        |        |      |   |                          |                        |   |
|------------------------|--------|------|---|--------------------------|------------------------|---|
| 17 (1/3) Specific O.R. | -3.310 | 24.7 | 0 | Mon Sep 03 18:15:15 2018 | 0.00290g/mL MeOH LPN-5 | ↵ |
| 17 (2/3) Specific O.R. | -2.138 | 24.8 | 0 | Mon Sep 03 18:15:21 2018 | 0.00290g/mL MeOH LPN-5 | ↵ |
| 17 (3/3) Specific O.R. | -3.310 | 24.8 | 0 | Mon Sep 03 18:15:26 2018 | 0.00290g/mL MeOH LPN-5 | ↵ |

**Figure S39.** Experimental optical rotation of compound **3**
